# Supplementary material for: Design and Synthesis of an 18F-Labeled Version of Phenylethyl Orvinol ([18F]FE-PEO) for PET-Imaging of Opioid Receptors
Source: Molecules. 2012 Sep 28;17(10):11554–69. doi: 10.3390/molecules171011554 (PMC6268392; doi:10.3390/molecules171011554)

**Figure S1.**  $^1\text{H}$ -NMR spectrum of FE-TDPEO (**2**) in  $\text{CDCl}_3$ .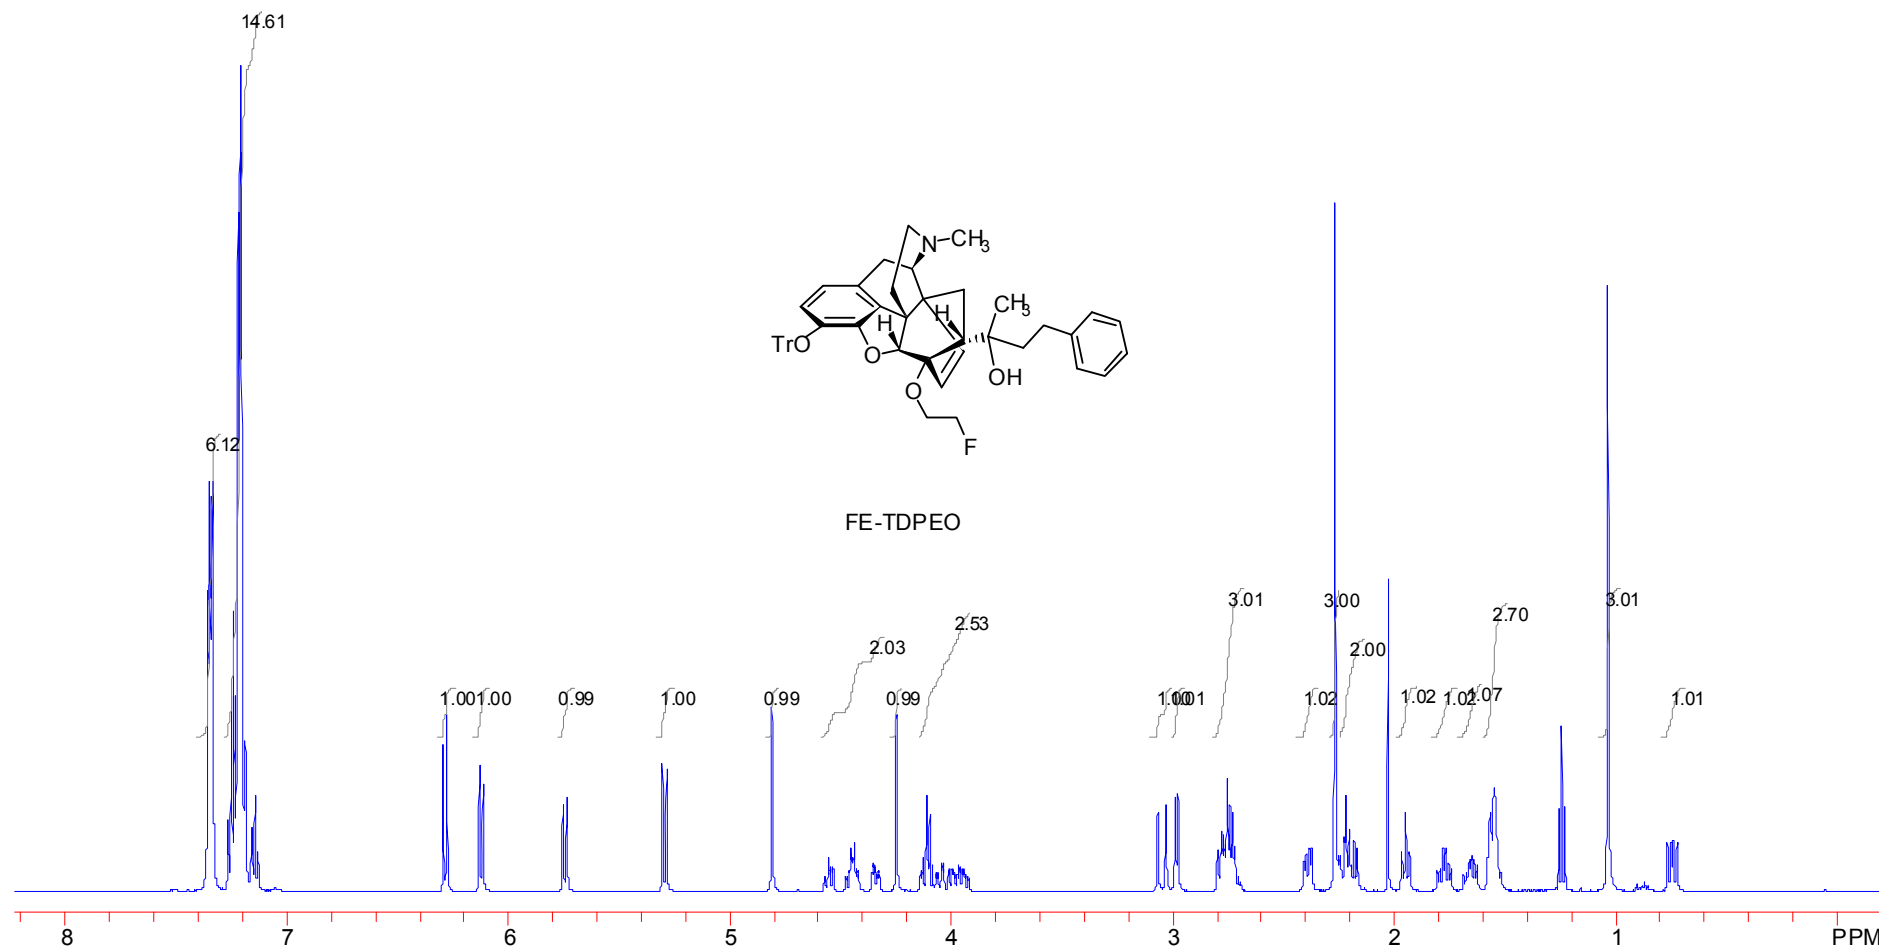

**Figure S2.**  $^{13}\text{C}$ -NMR spectrum of FE-TDPEO (**2**) in  $\text{CDCl}_3$ .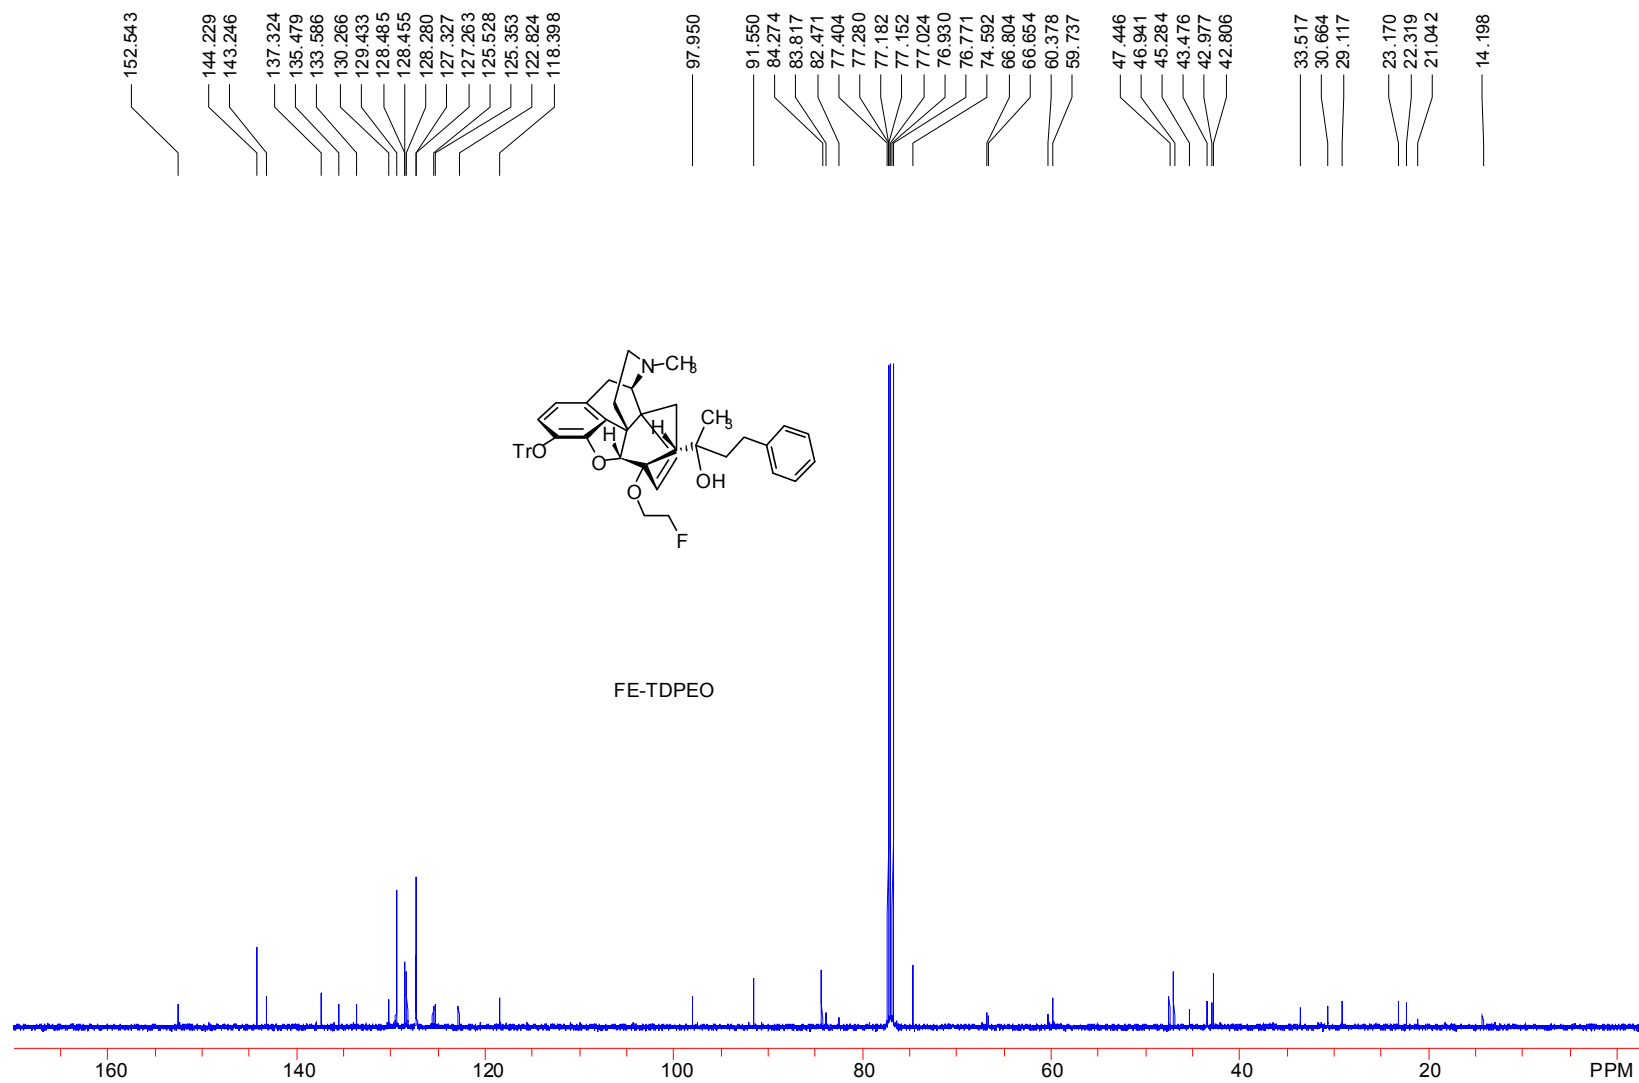

**Figure S3.**  $^{19}\text{F}$ -NMR spectrum of FE-TDPEO (**2**) in  $\text{CDCl}_3$ .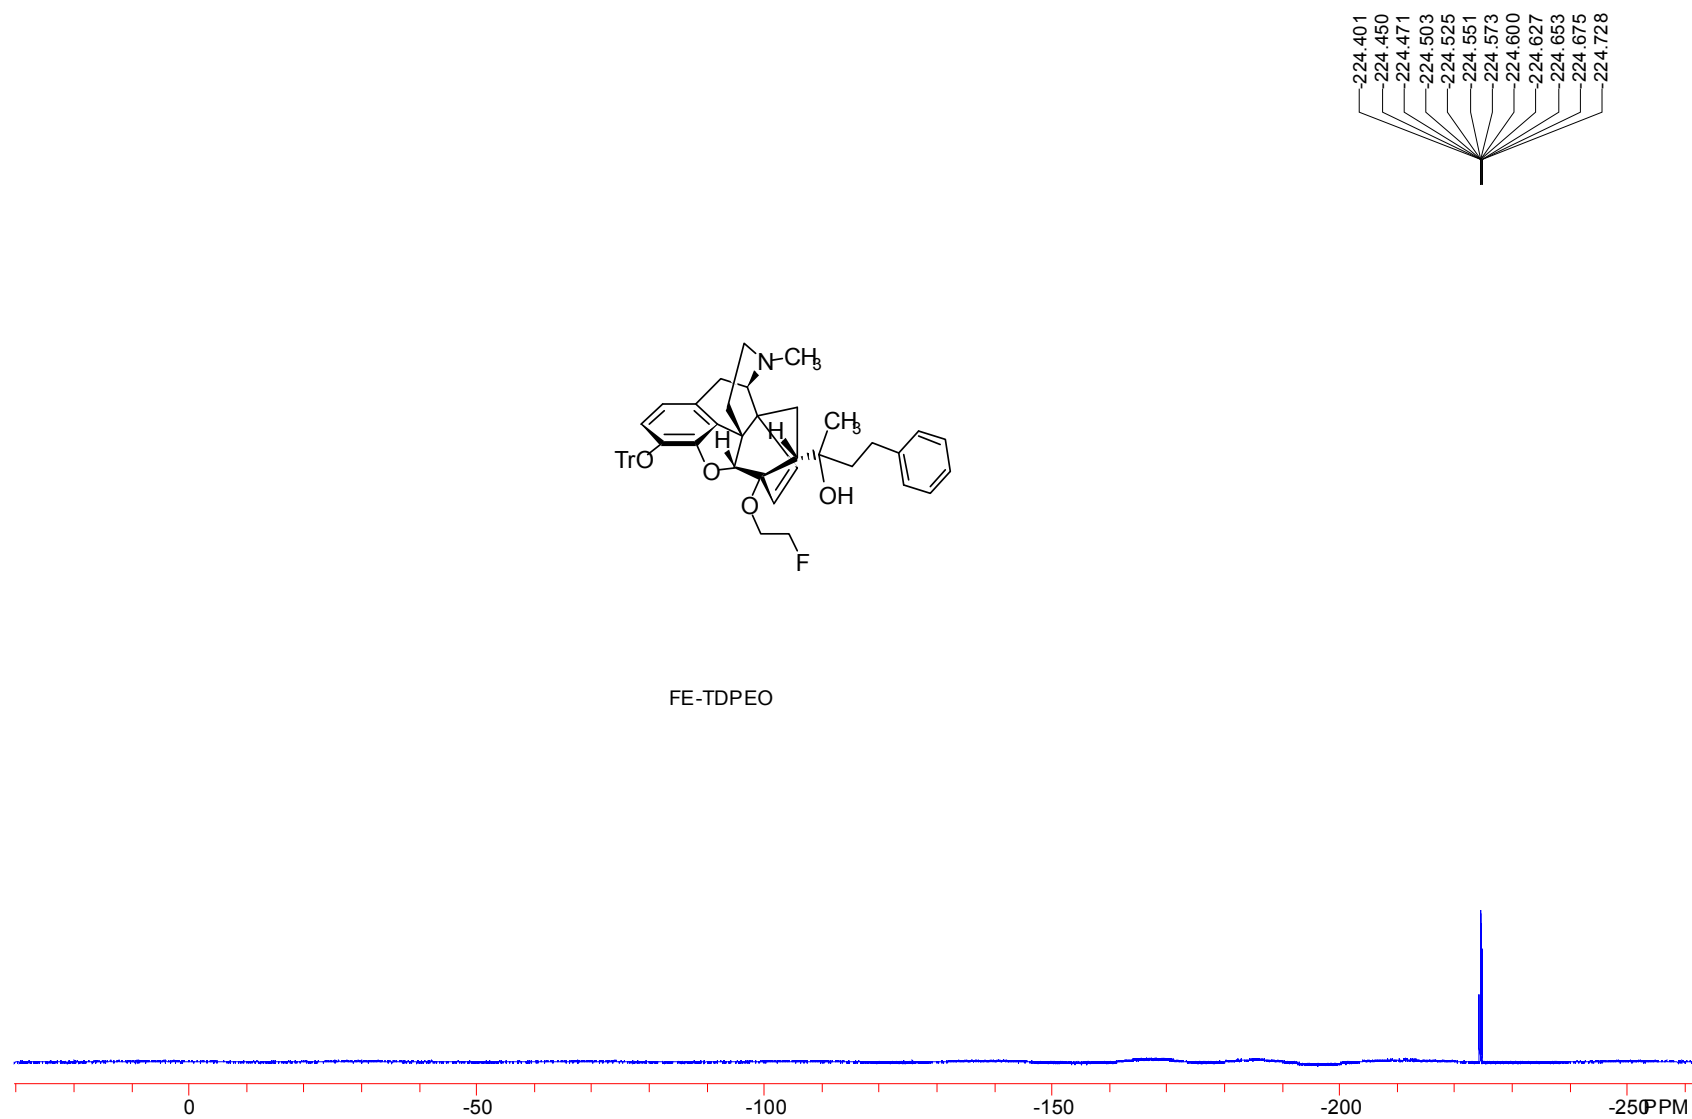

**Figure S4.** ESI-MS of FE-TDPEO (**2**) in  $\text{CDCl}_3$ .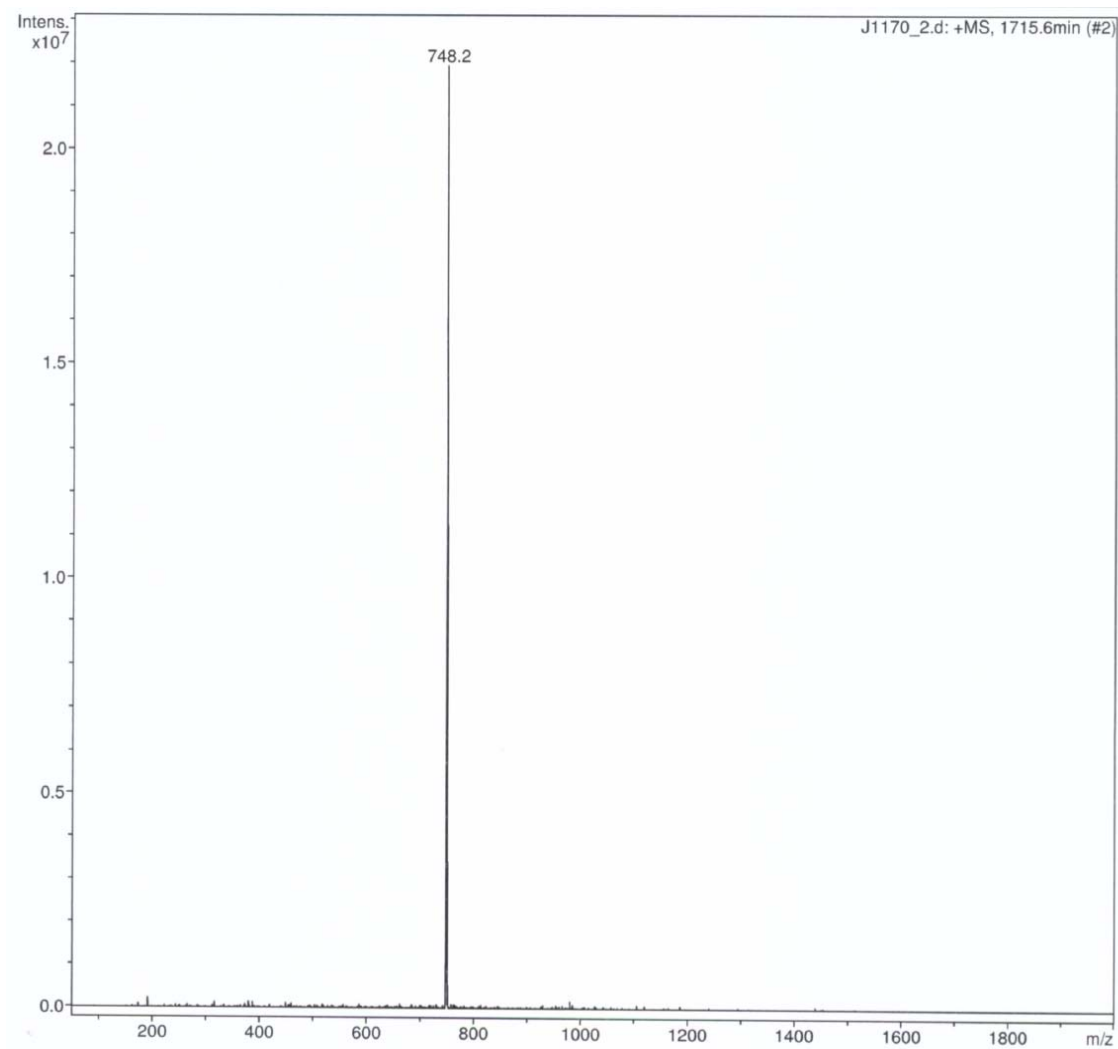

**Figure S5.**  $^1\text{H}$ -NMR spectrum of FE-PEO (**3**) in  $\text{CDCl}_3$ .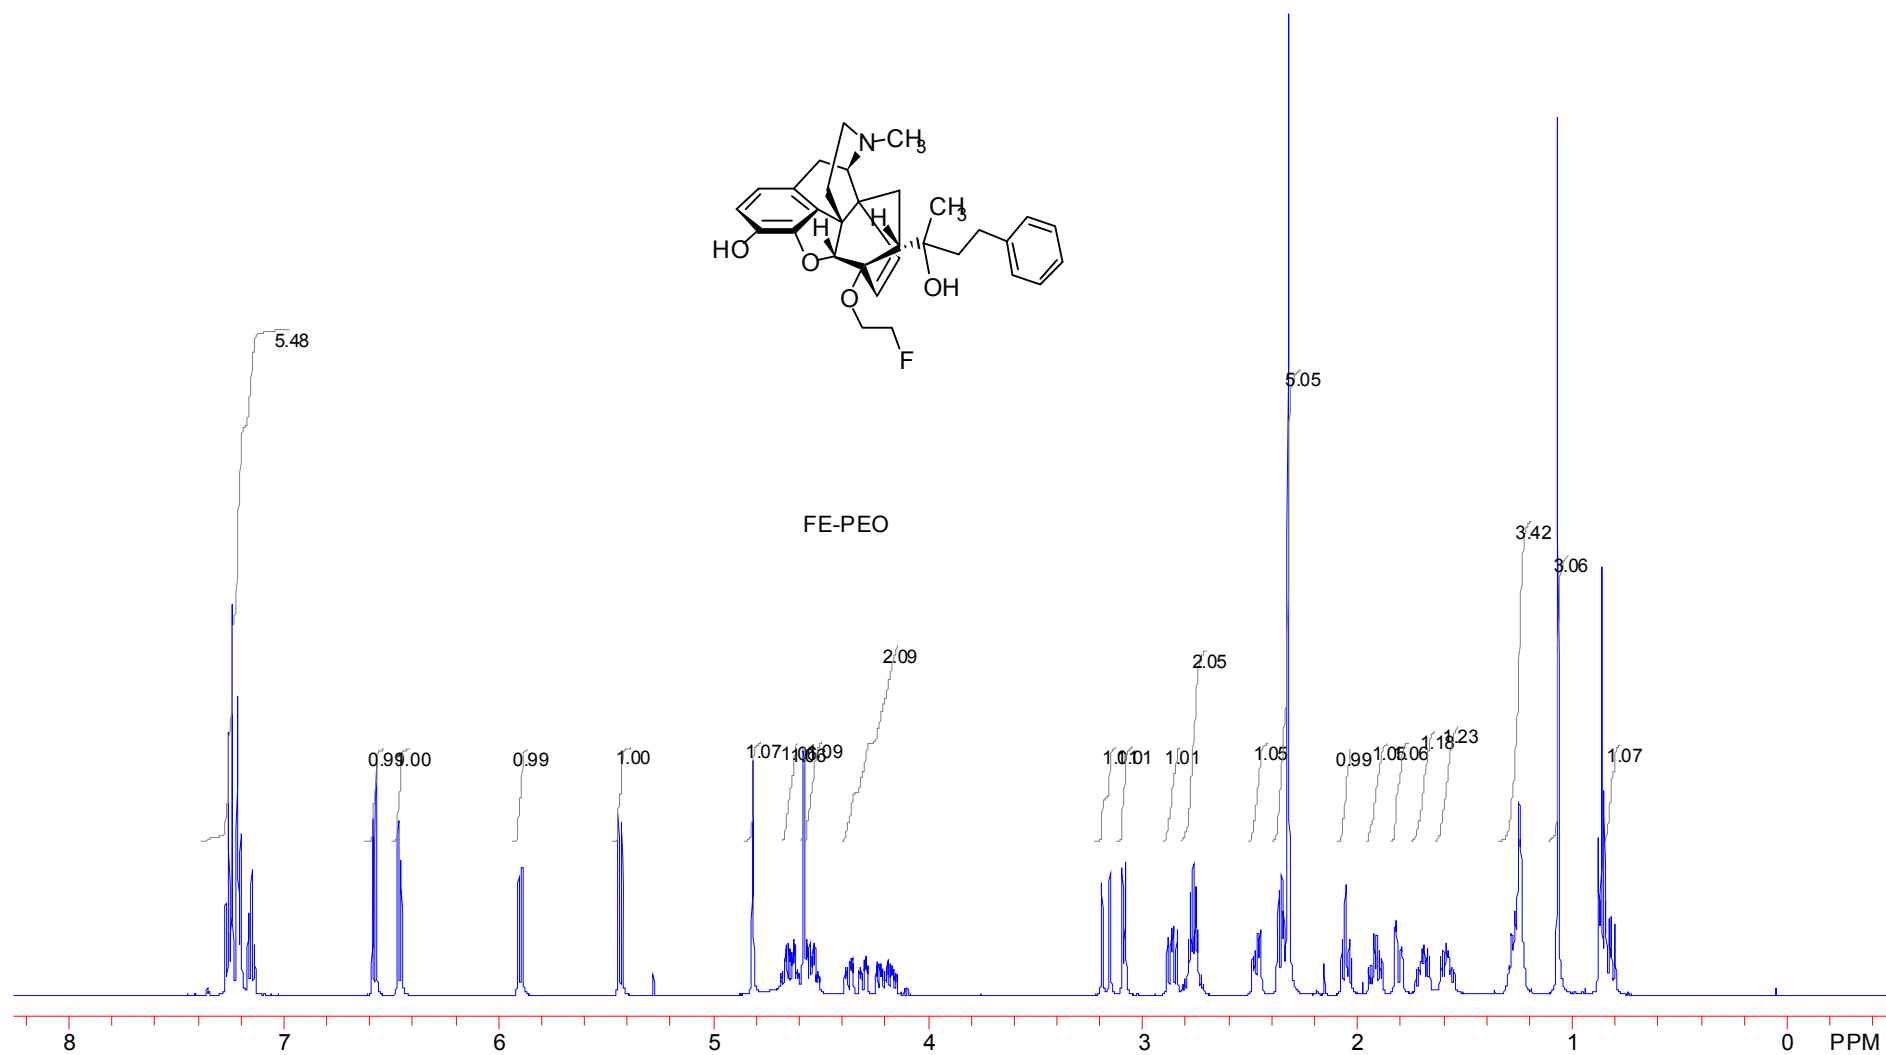

**Figure S6.**  $^{13}\text{C}$ -NMR spectrum of FE-PEO (**3**) in  $\text{CDCl}_3$ .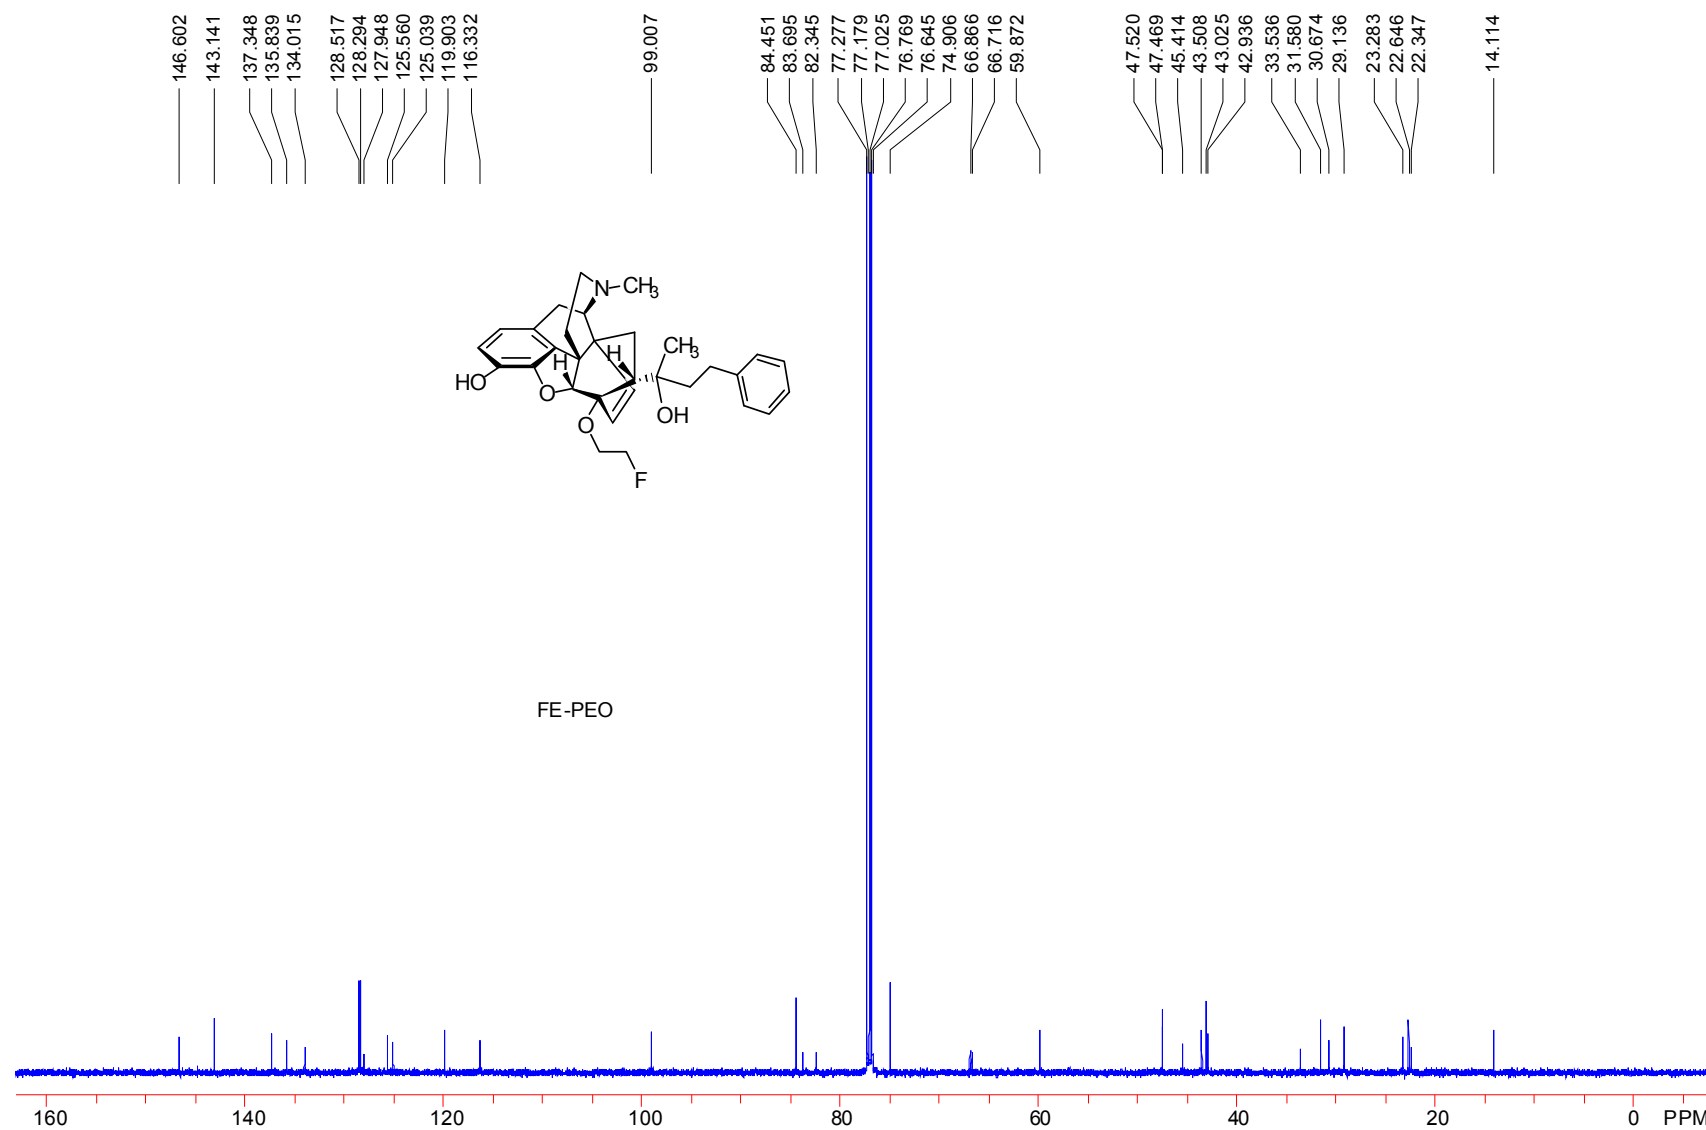

**Figure S7.**  $^{19}\text{F}$ -NMR spectrum of FE-PEO (**3**) in  $\text{CDCl}_3$ .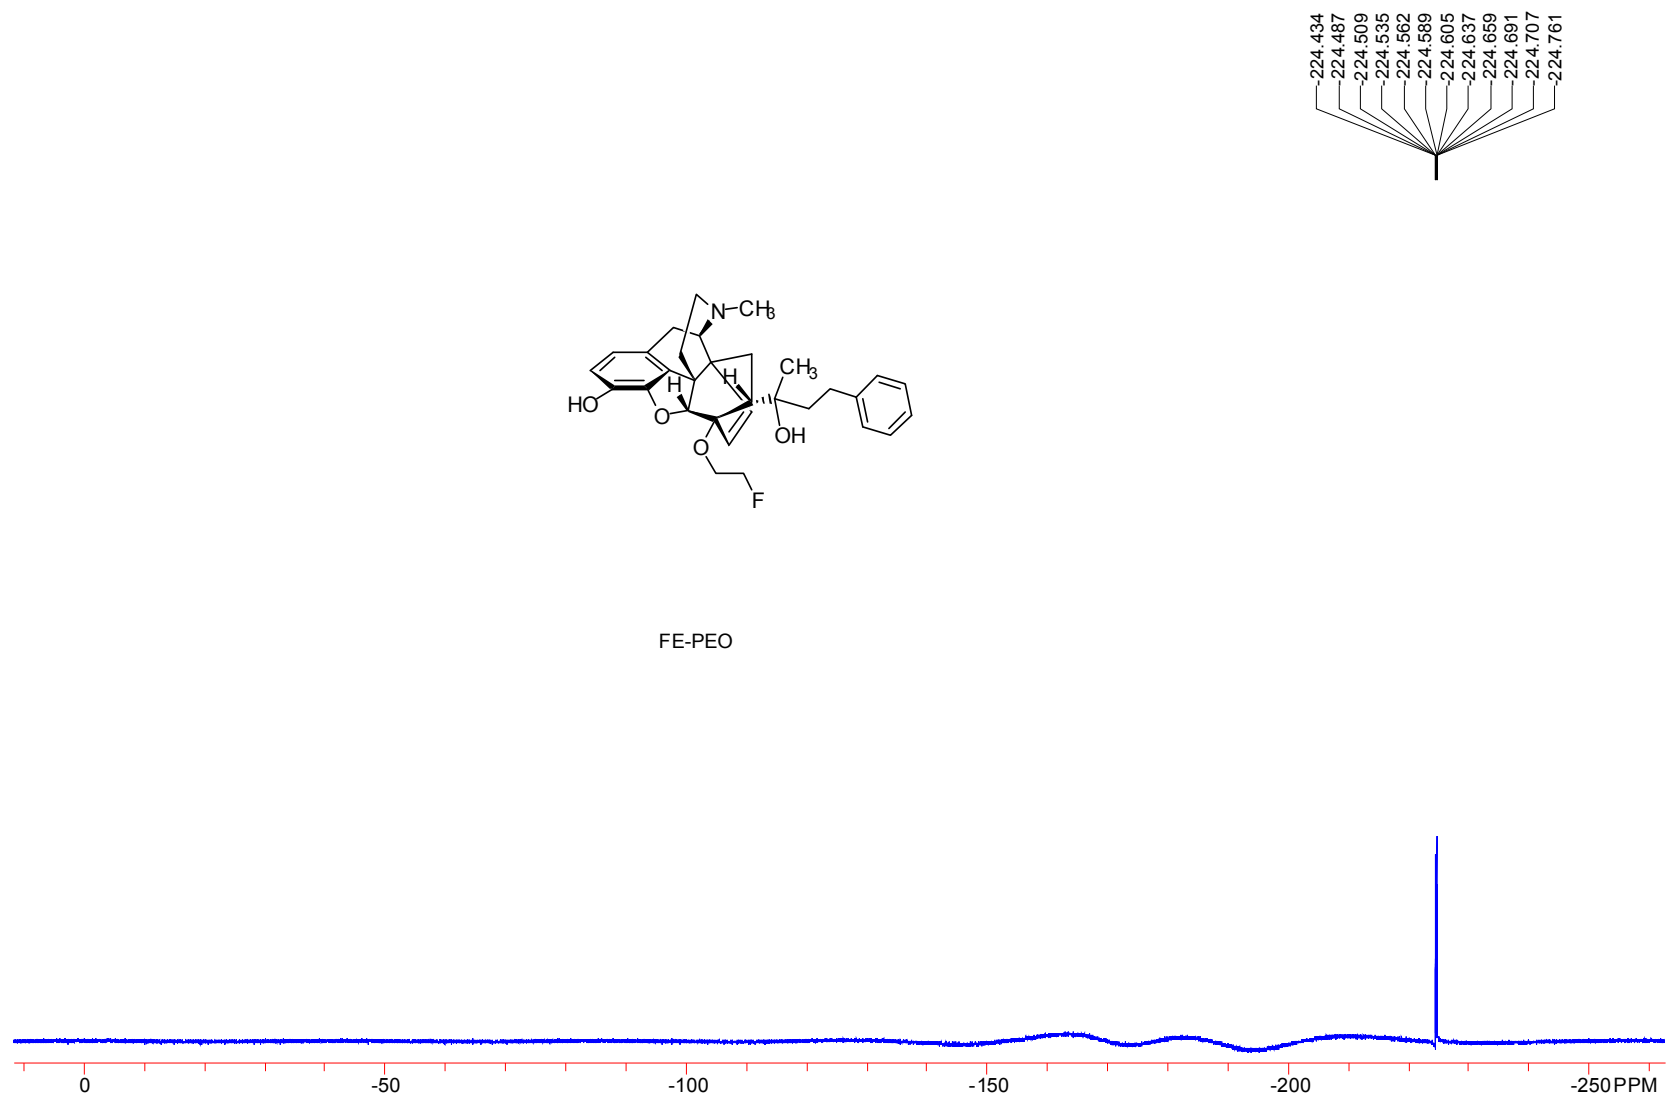

**Figure S8.** ESI-MS of FE-PEO (3).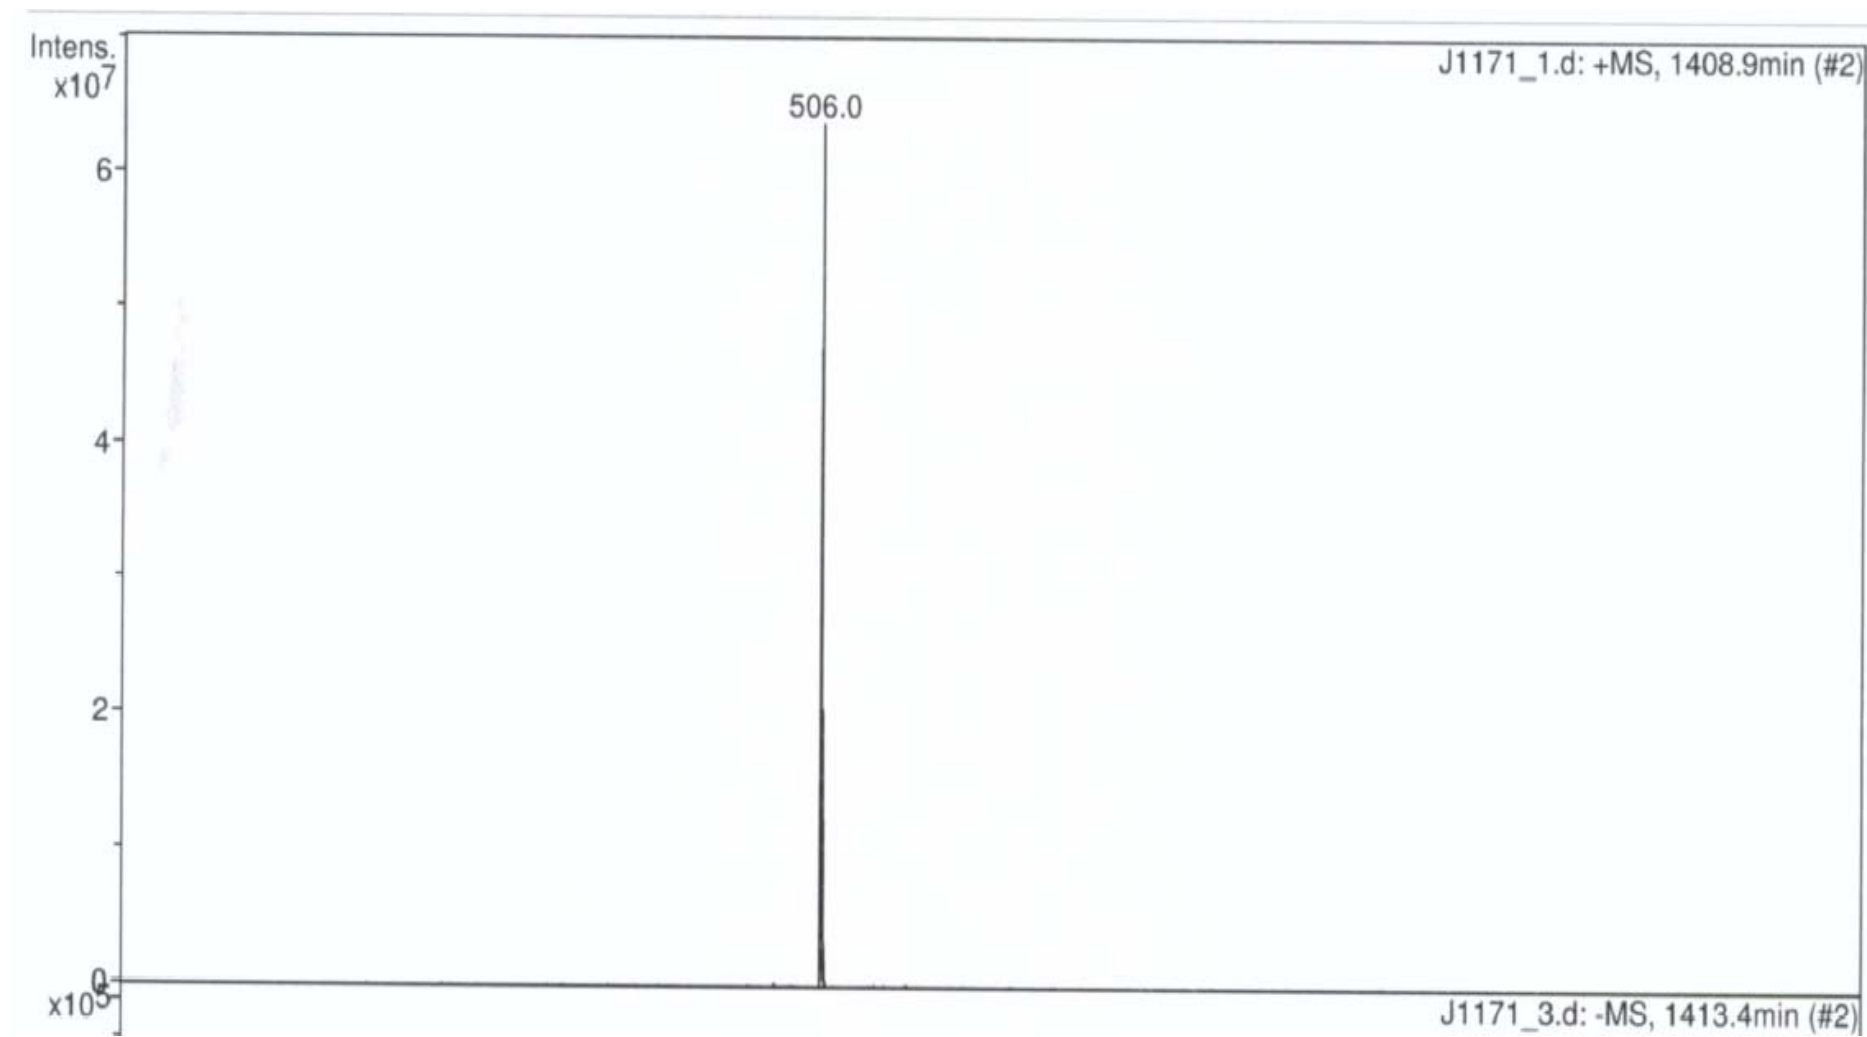

**Figure S9.**  $^1\text{H}$ -NMR spectrum of HE-TDPEO (**4**) in  $\text{CDCl}_3$ .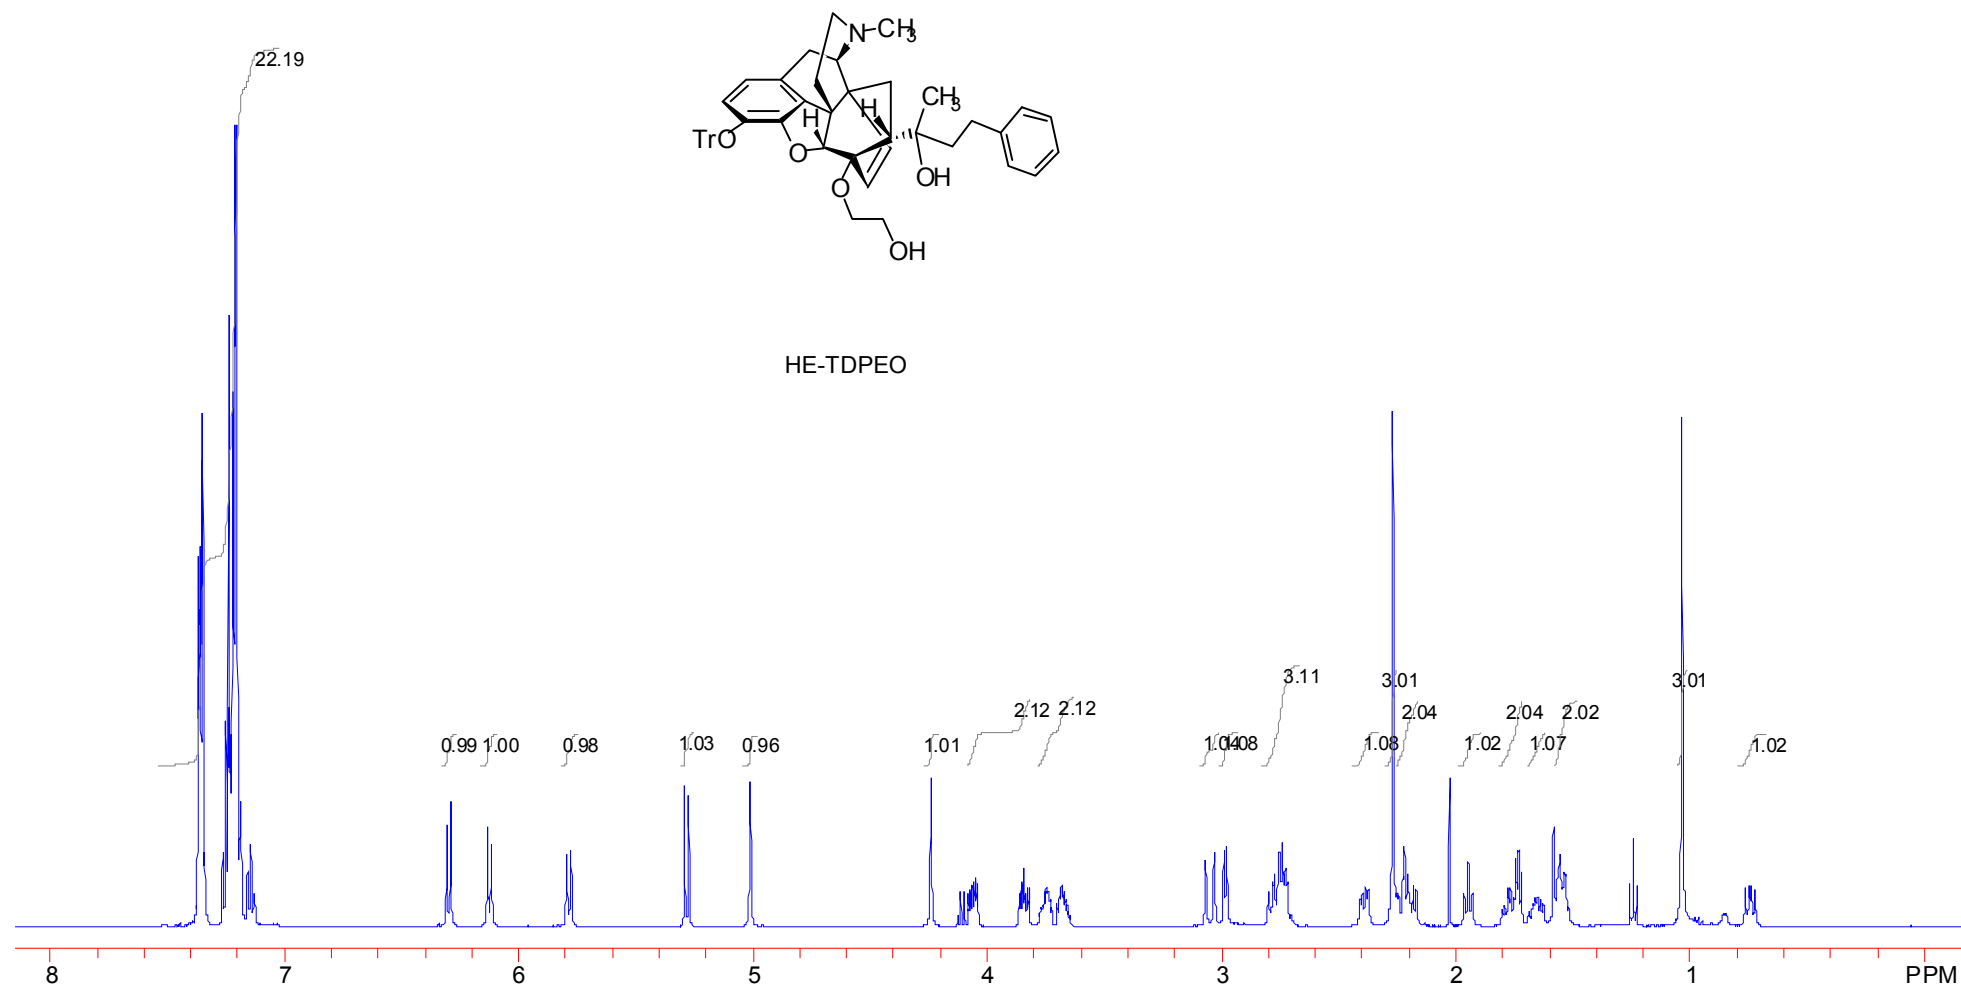

**Figure S10.**  $^{13}\text{C}$ -NMR spectrum of HE-TDPEO (4) in  $\text{CDCl}_3$ .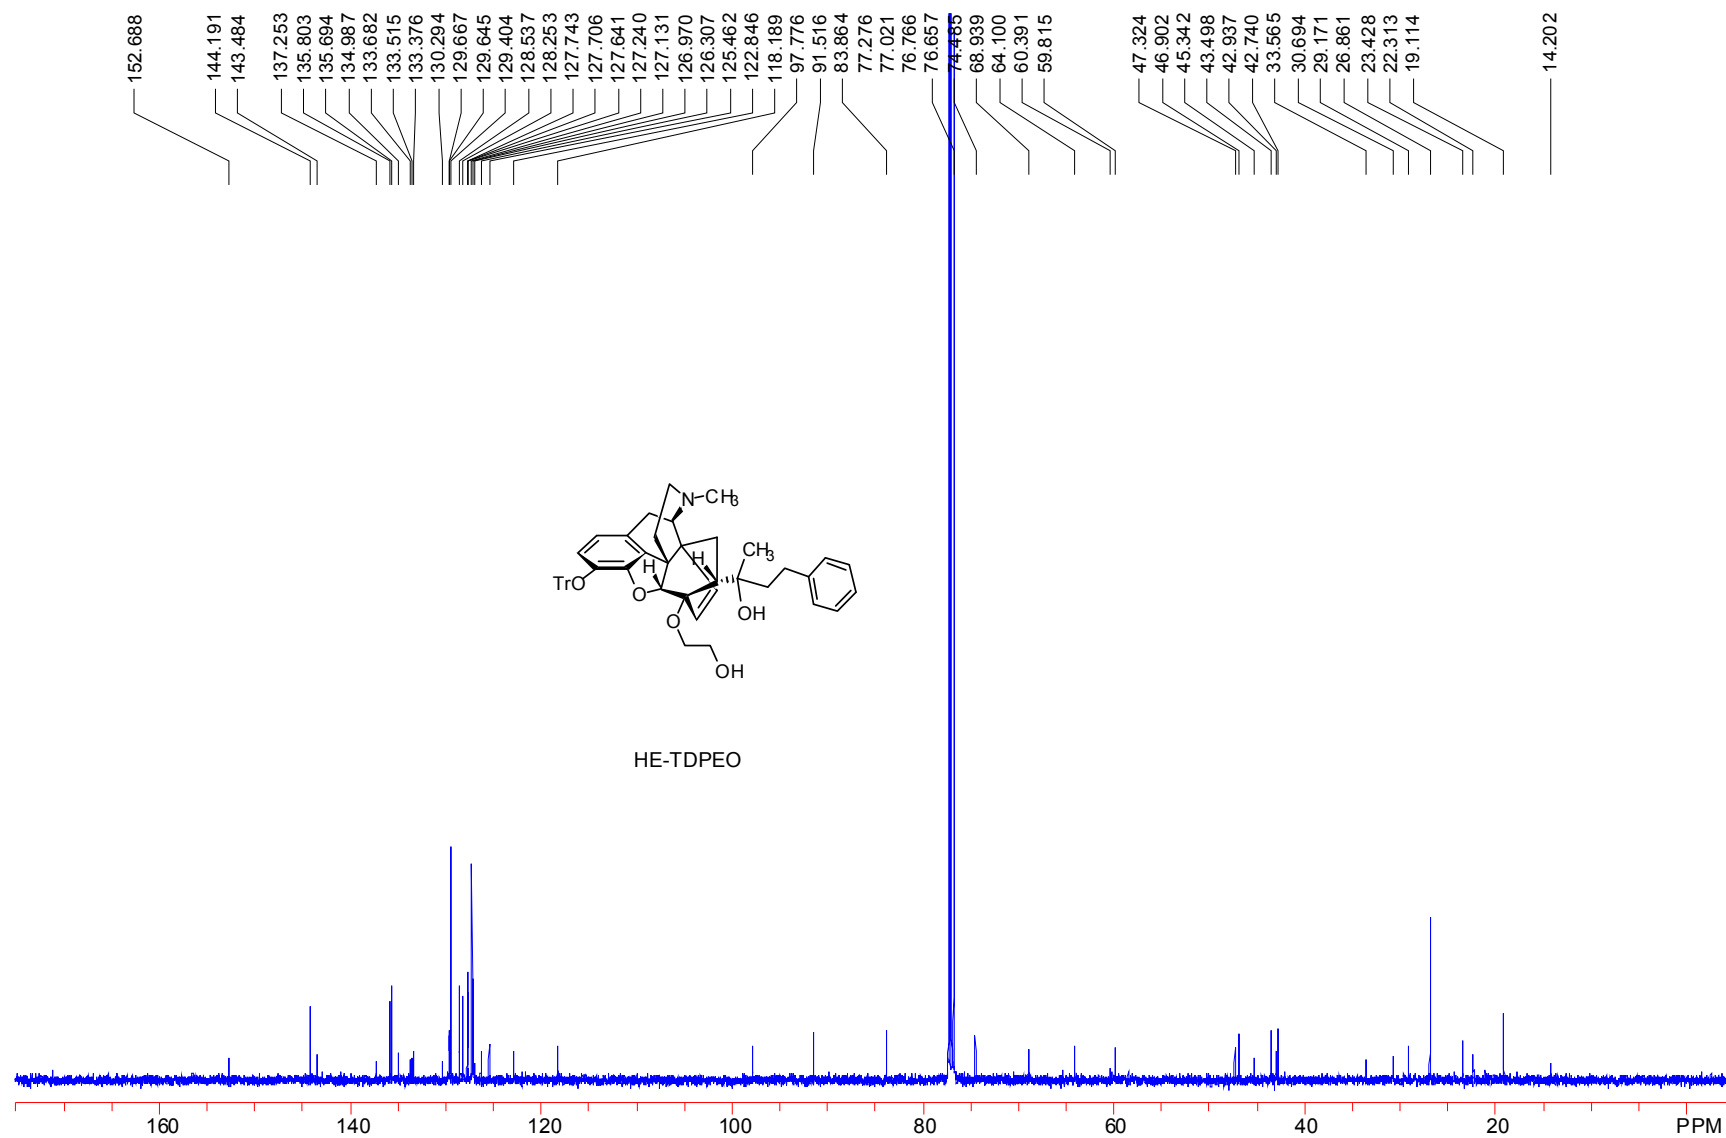

**Figure S11.** ESI-MS of HE-TDPEO (4).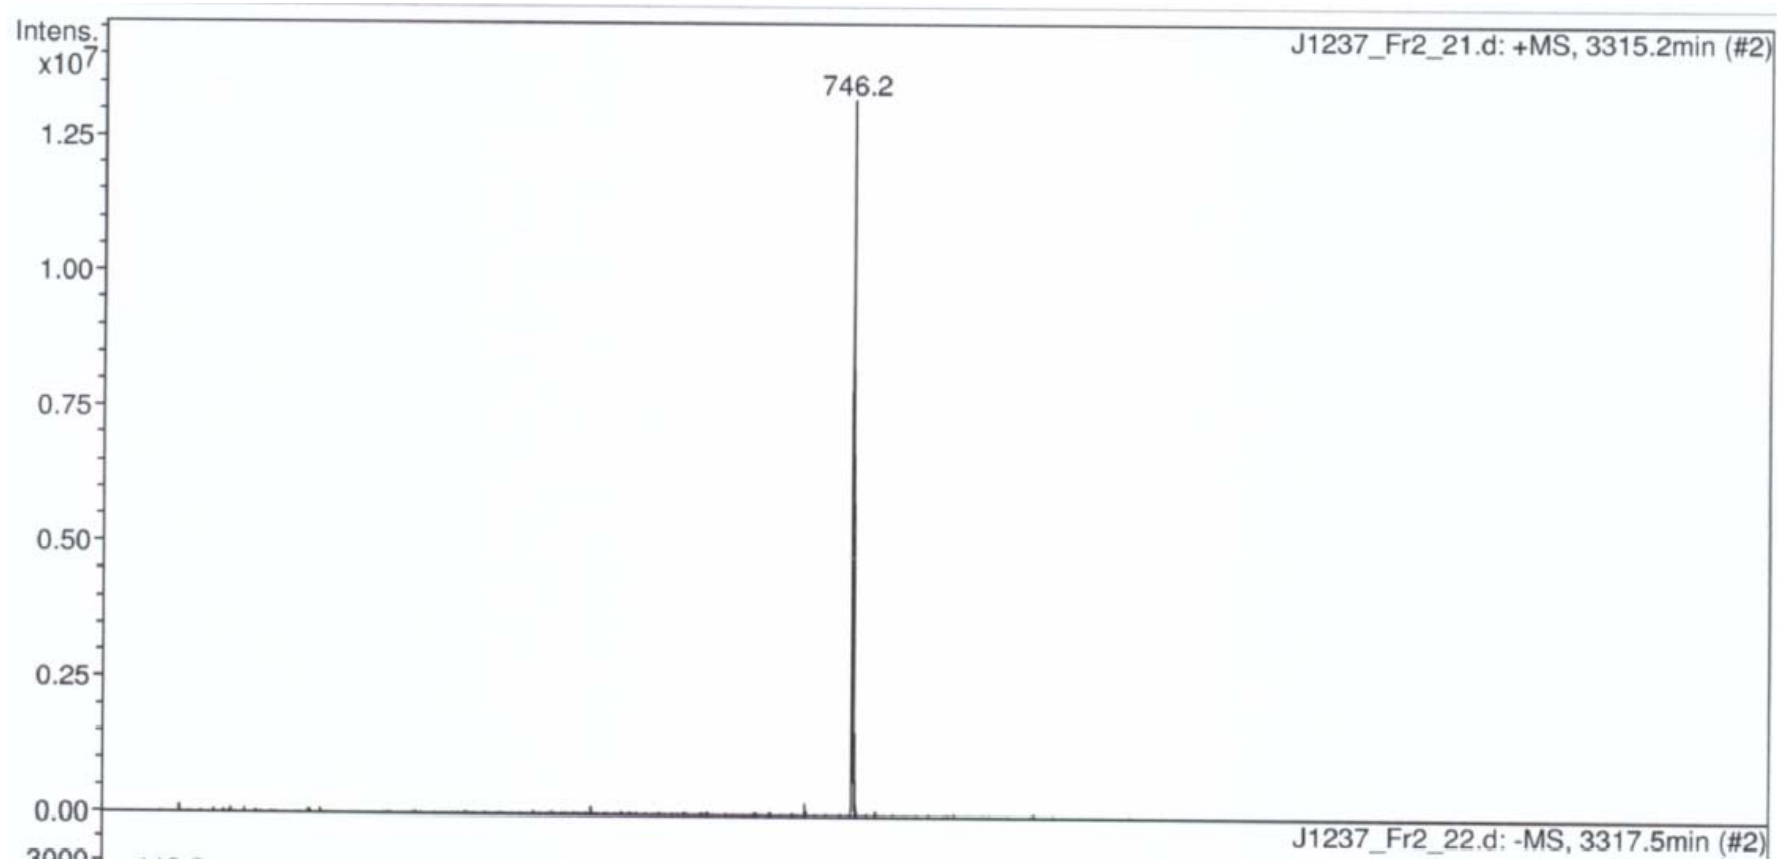

**Figure S12.**  $^1\text{H}$ -NMR spectrum of TE-TDPEO (**5**) in  $\text{CDCl}_3$ .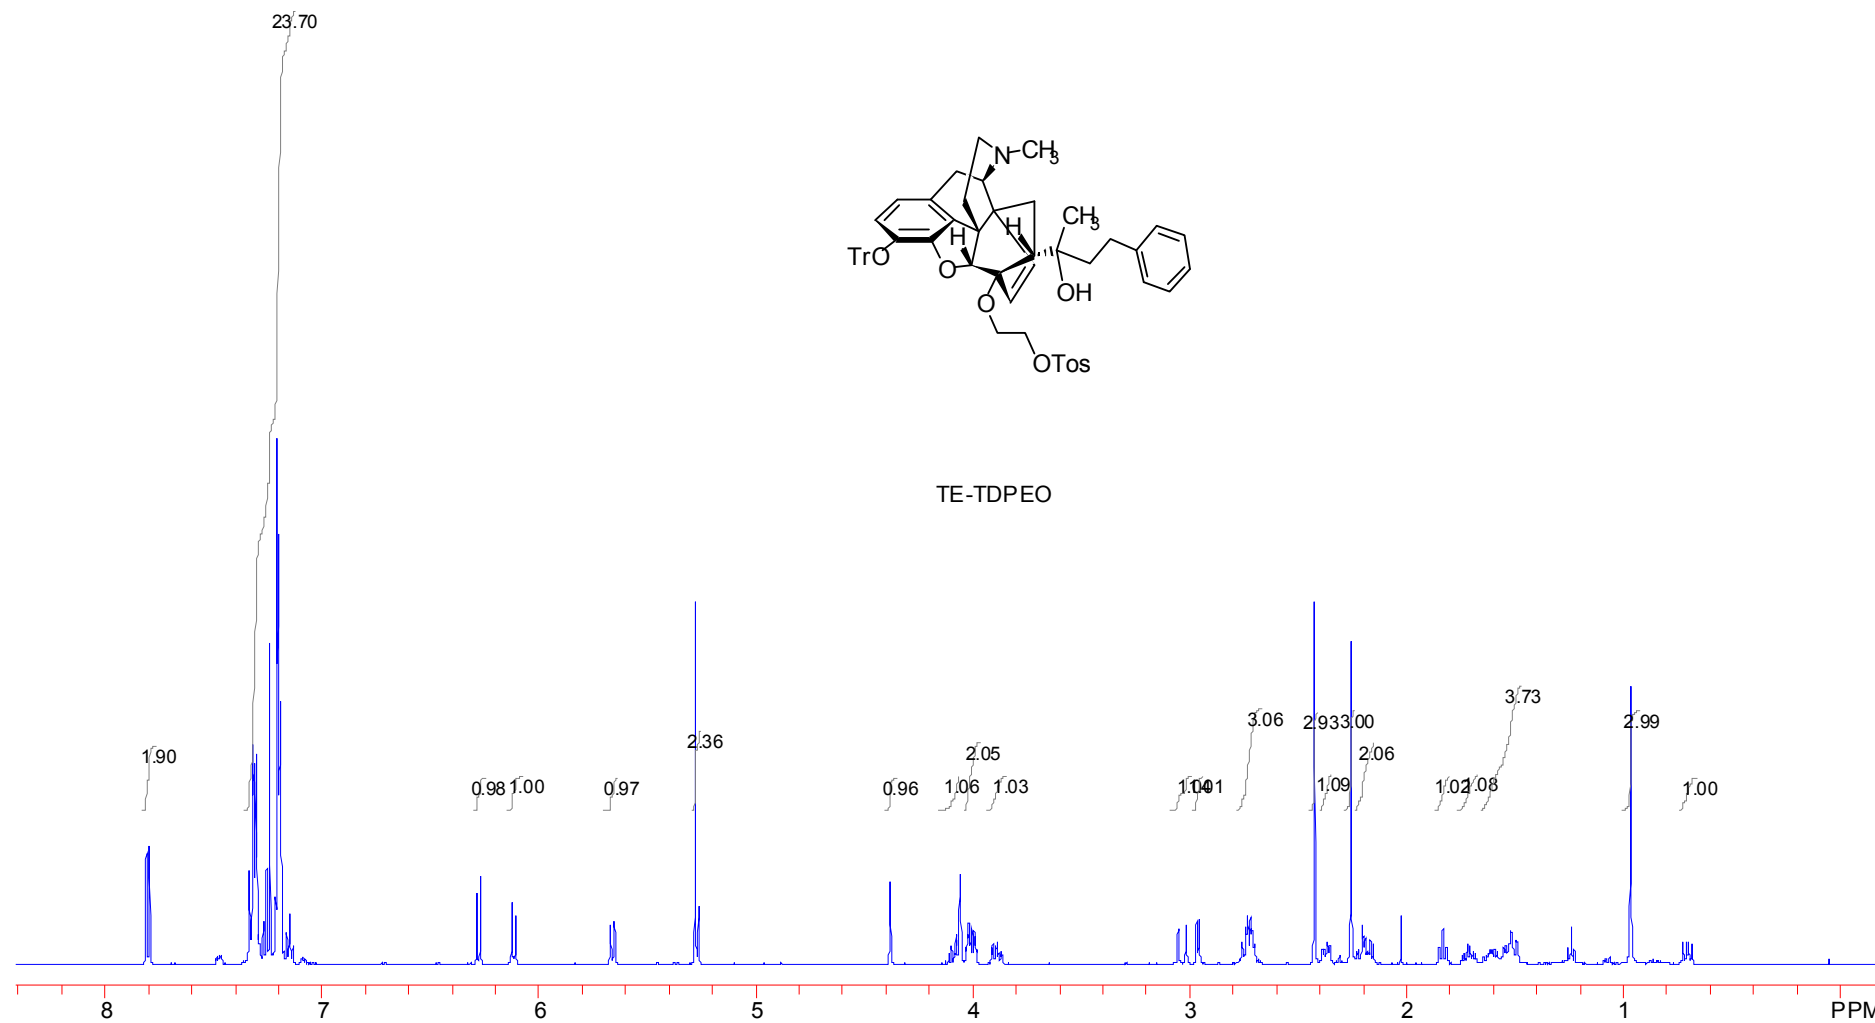

**Figure S13.**  $^{13}\text{C}$ -NMR spectrum of TE-TDPEO (**5**) in  $\text{CDCl}_3$ 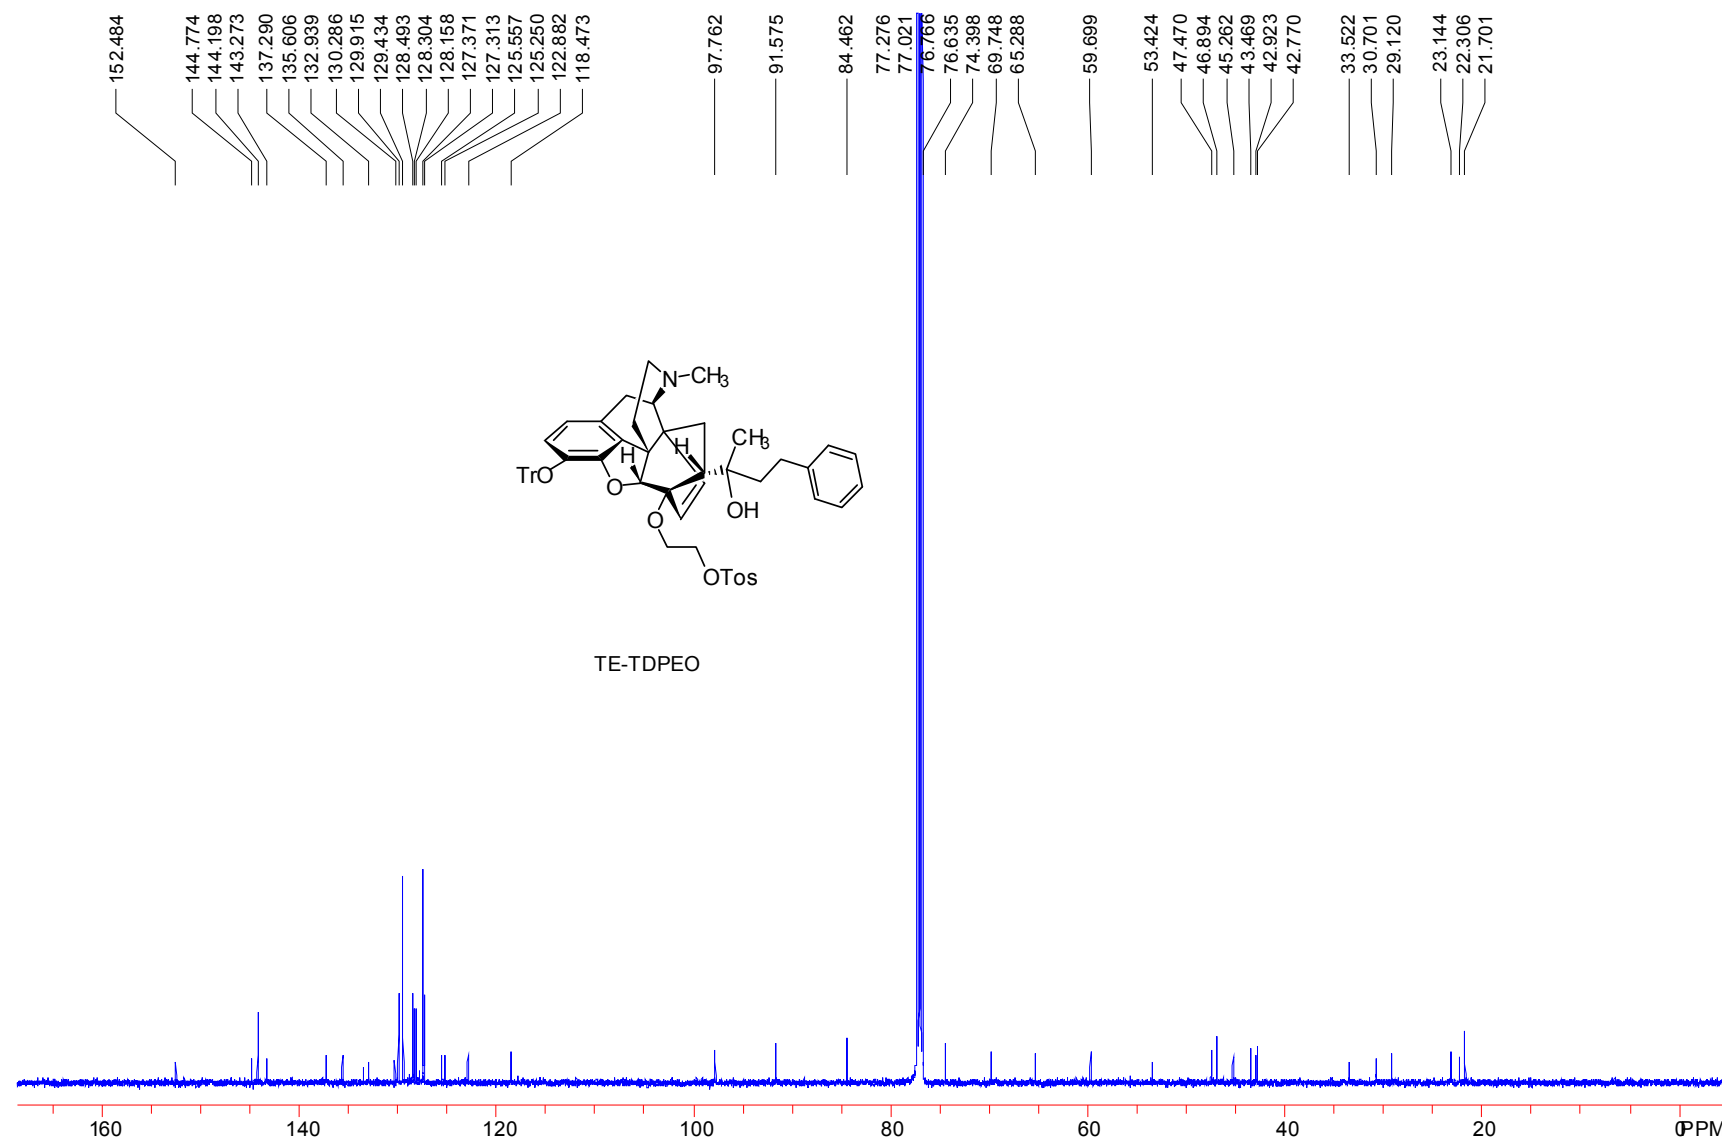

**Figure S14.** ESI-MS of TE-TDPEO (5).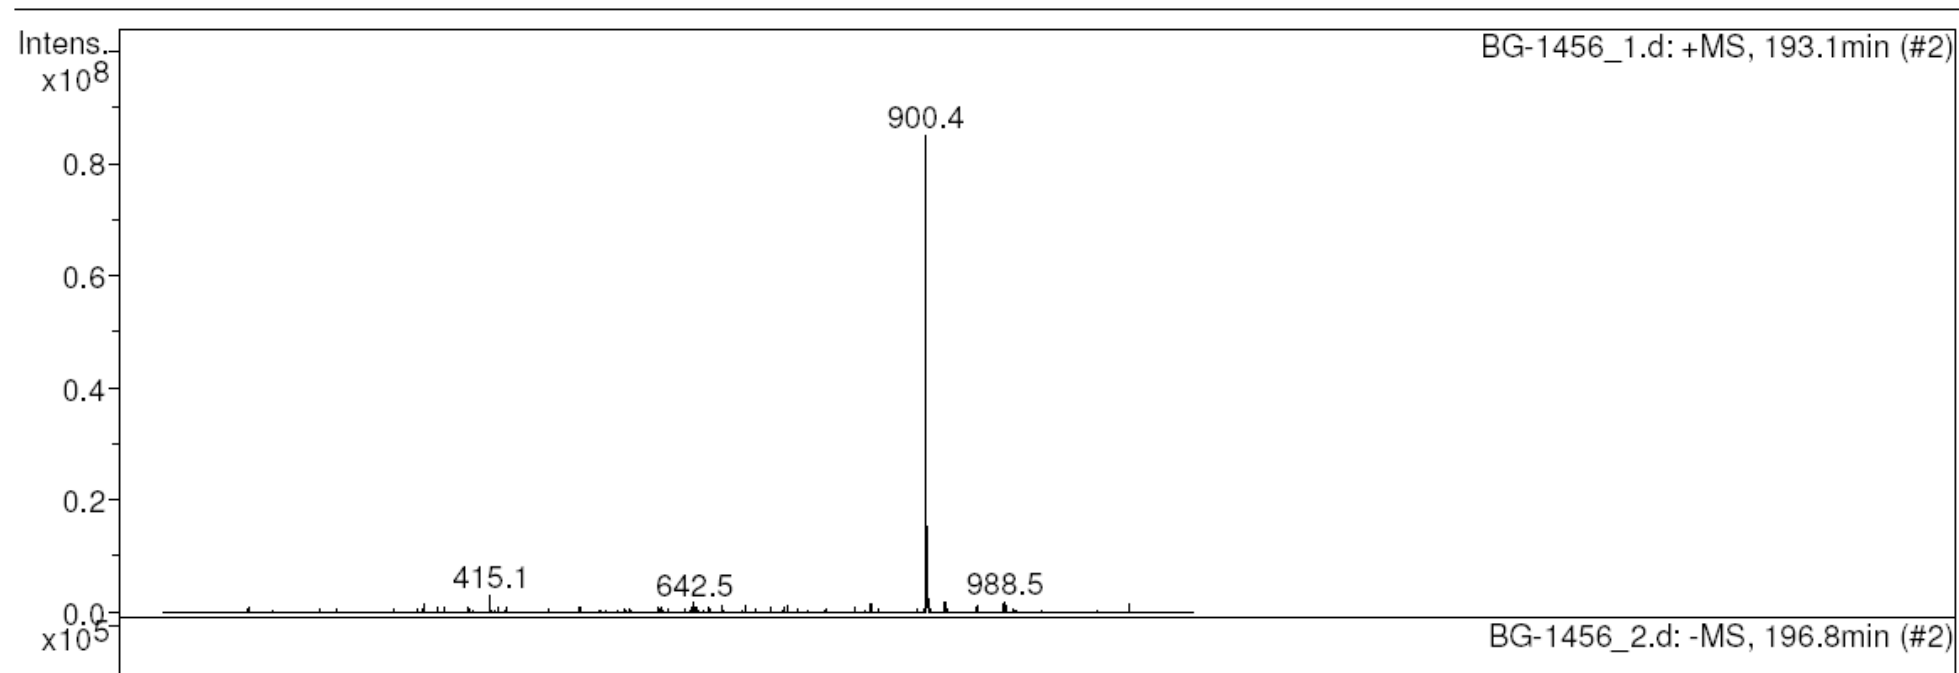

**Figure S15.**  $^1\text{H}$ -NMR spectrum of TBDPSOE-TDPEO (**6**) in  $\text{CHCl}_3$ .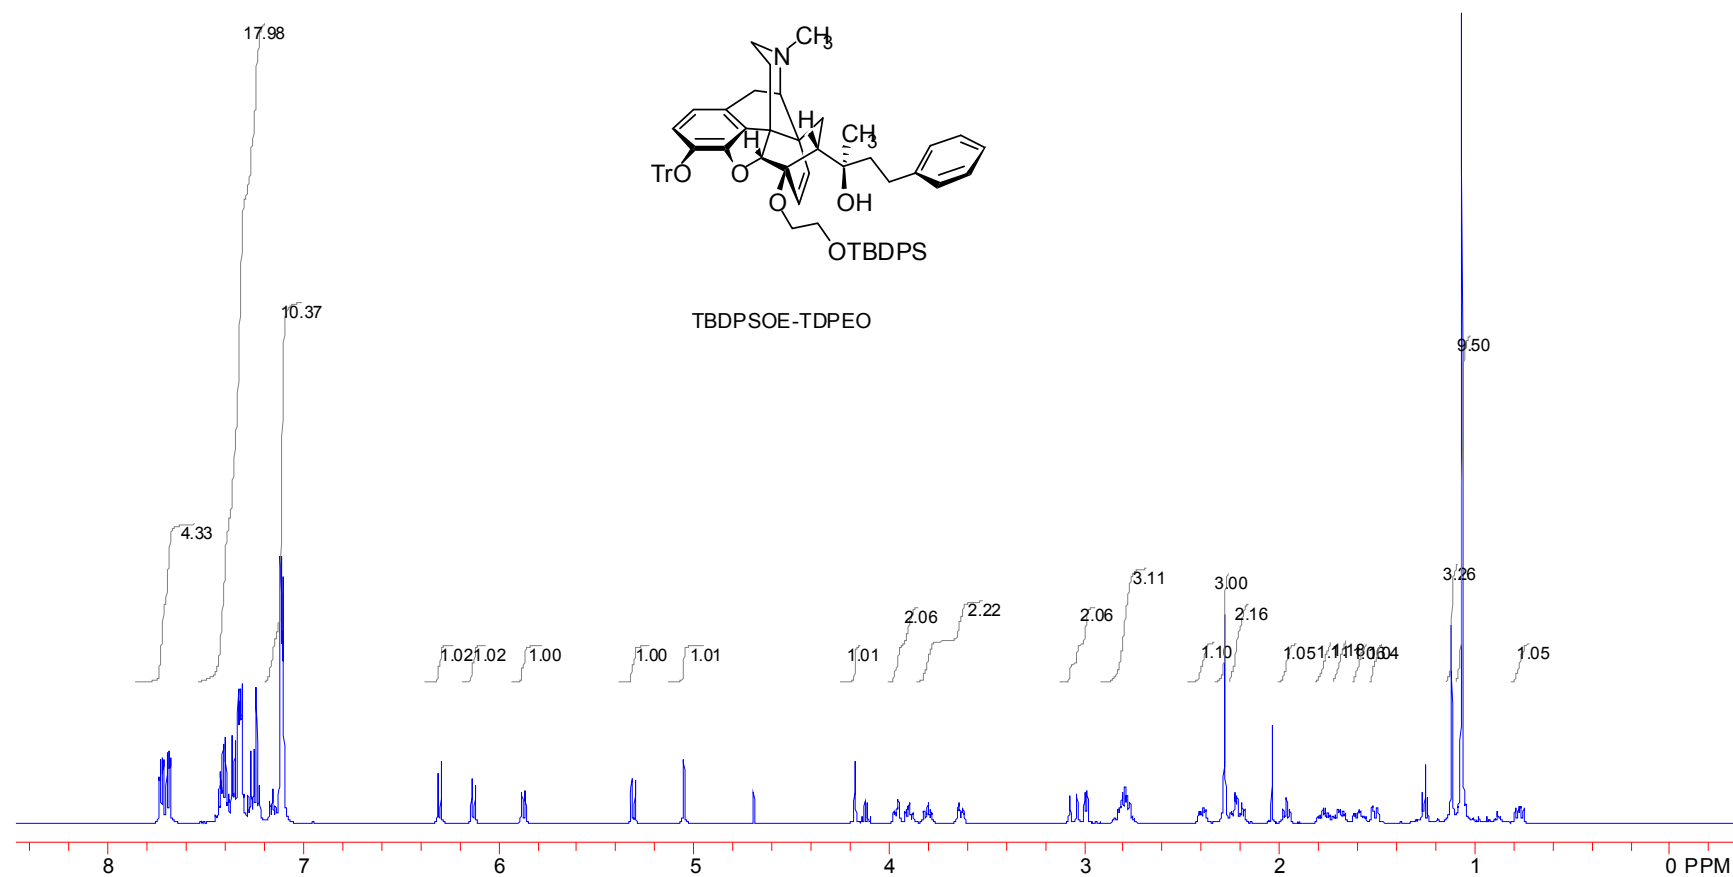

**Figure S16.**  $^{13}\text{C}$ -NMR spectrum of TBDPSOE -TDPEO (**6**) in  $\text{CDCl}_3$ .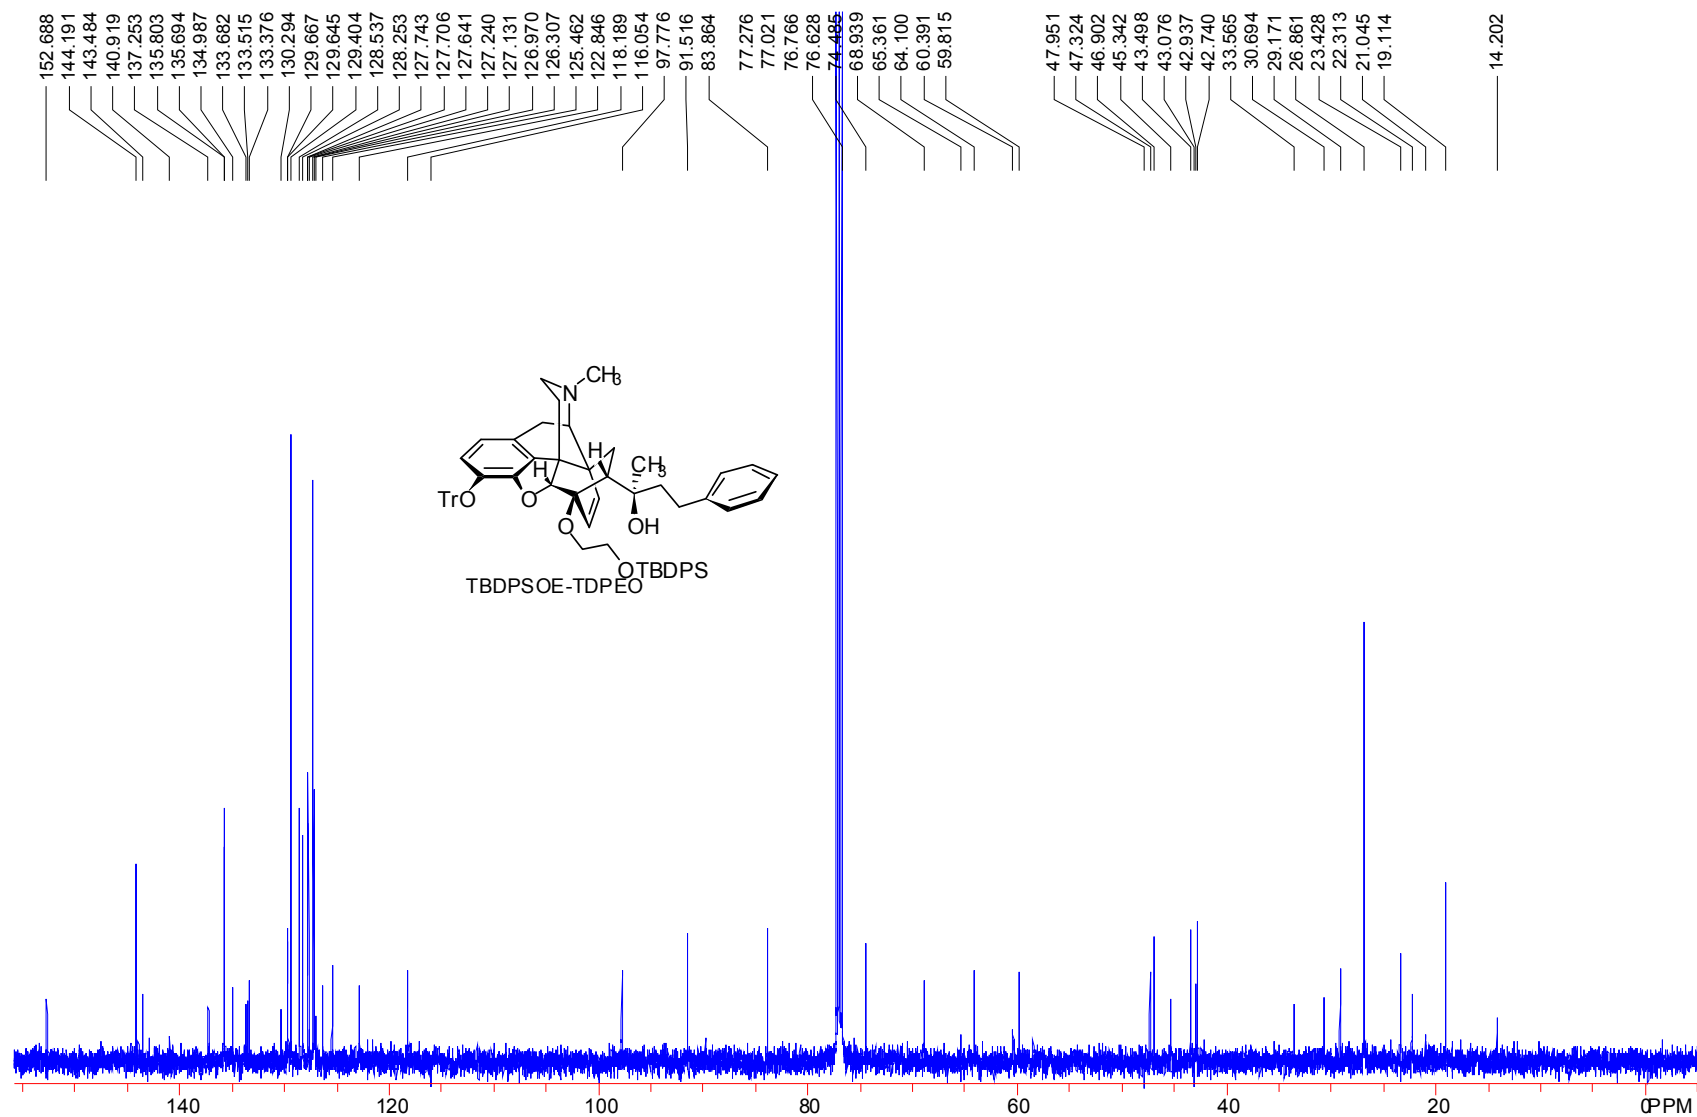

**Figure S17.** ESI-MS of TBDPSOE -TDPEO (6).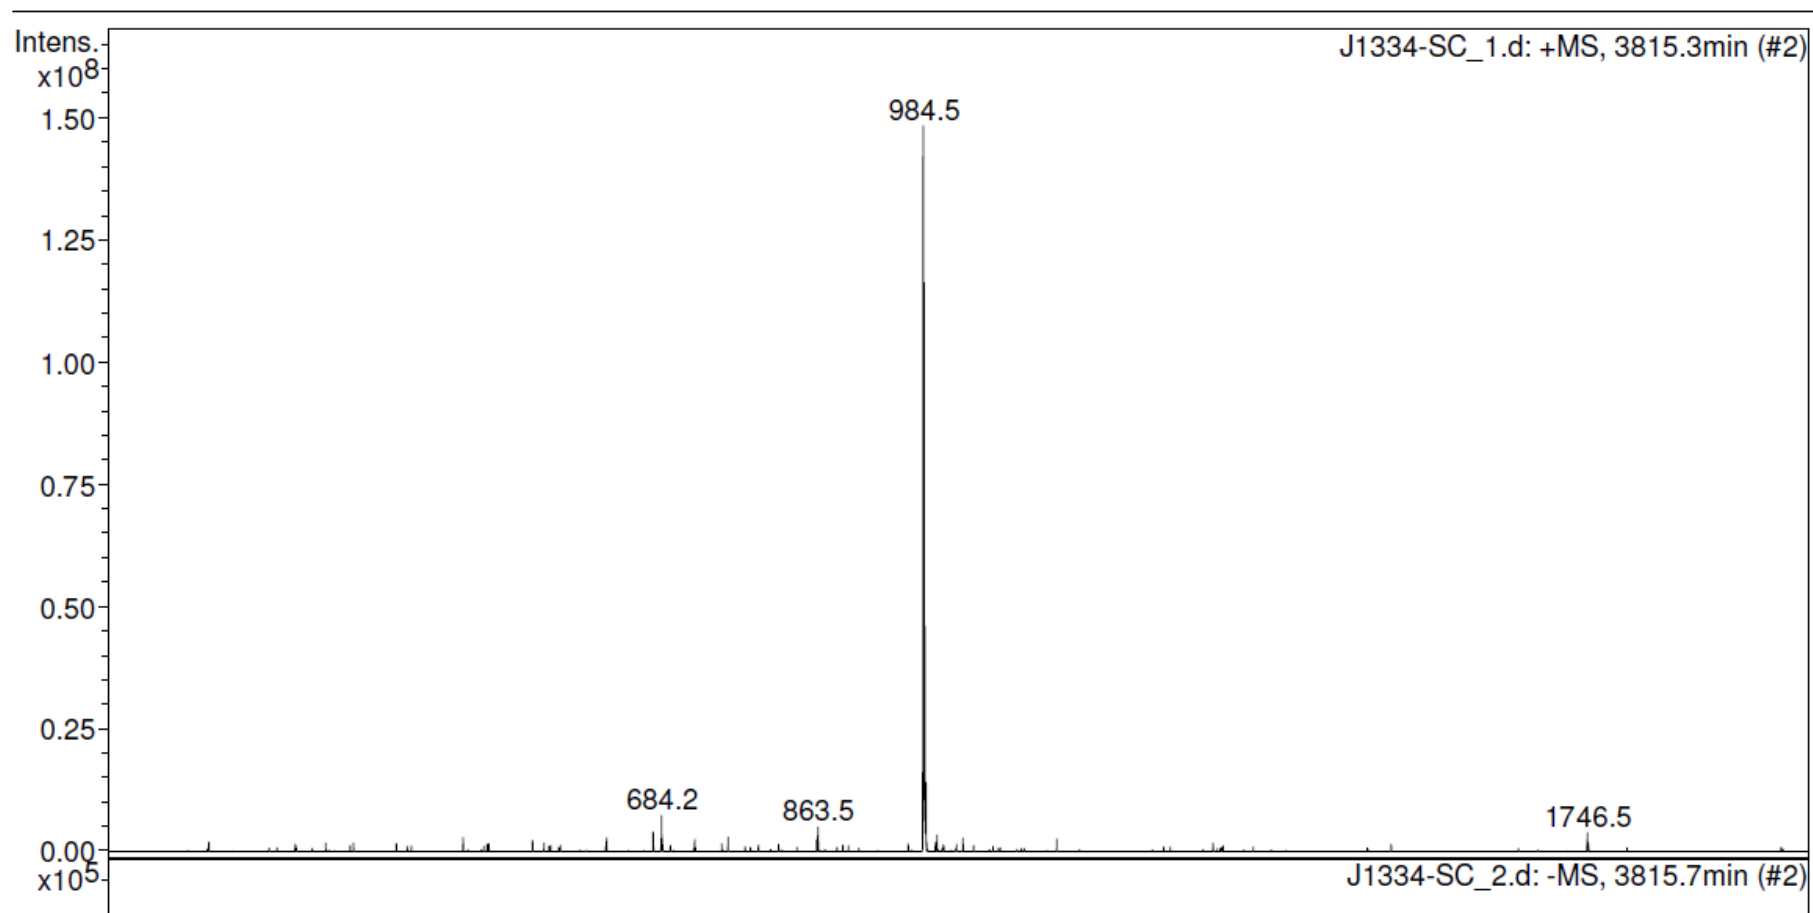

**Figure S18.**  $^1\text{H}$ -NMR spectrum of 6,20-ethylenedioxy-TDPEO (**7**) in  $\text{CDCl}_3$ .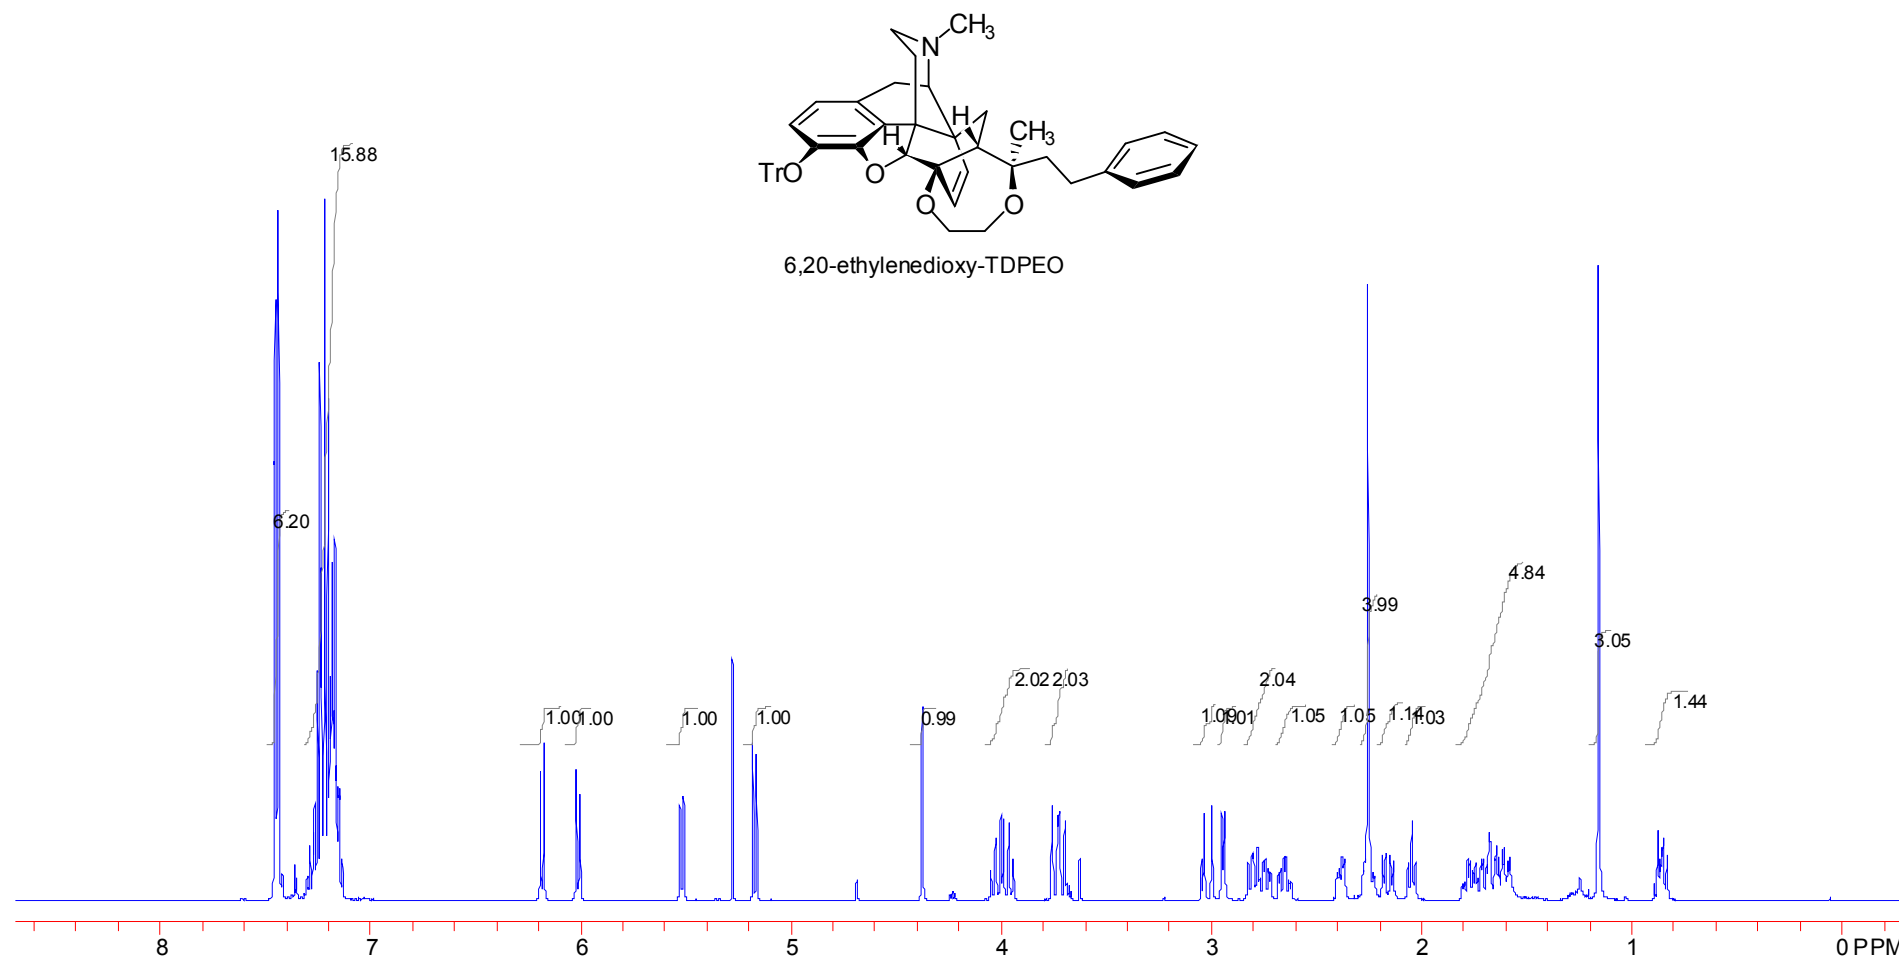

**Figure S19.**  $^{13}\text{C}$ -NMR spectrum of 6,20-ethylenedioxy-TDPEO (7) in  $\text{CDCl}_3$ .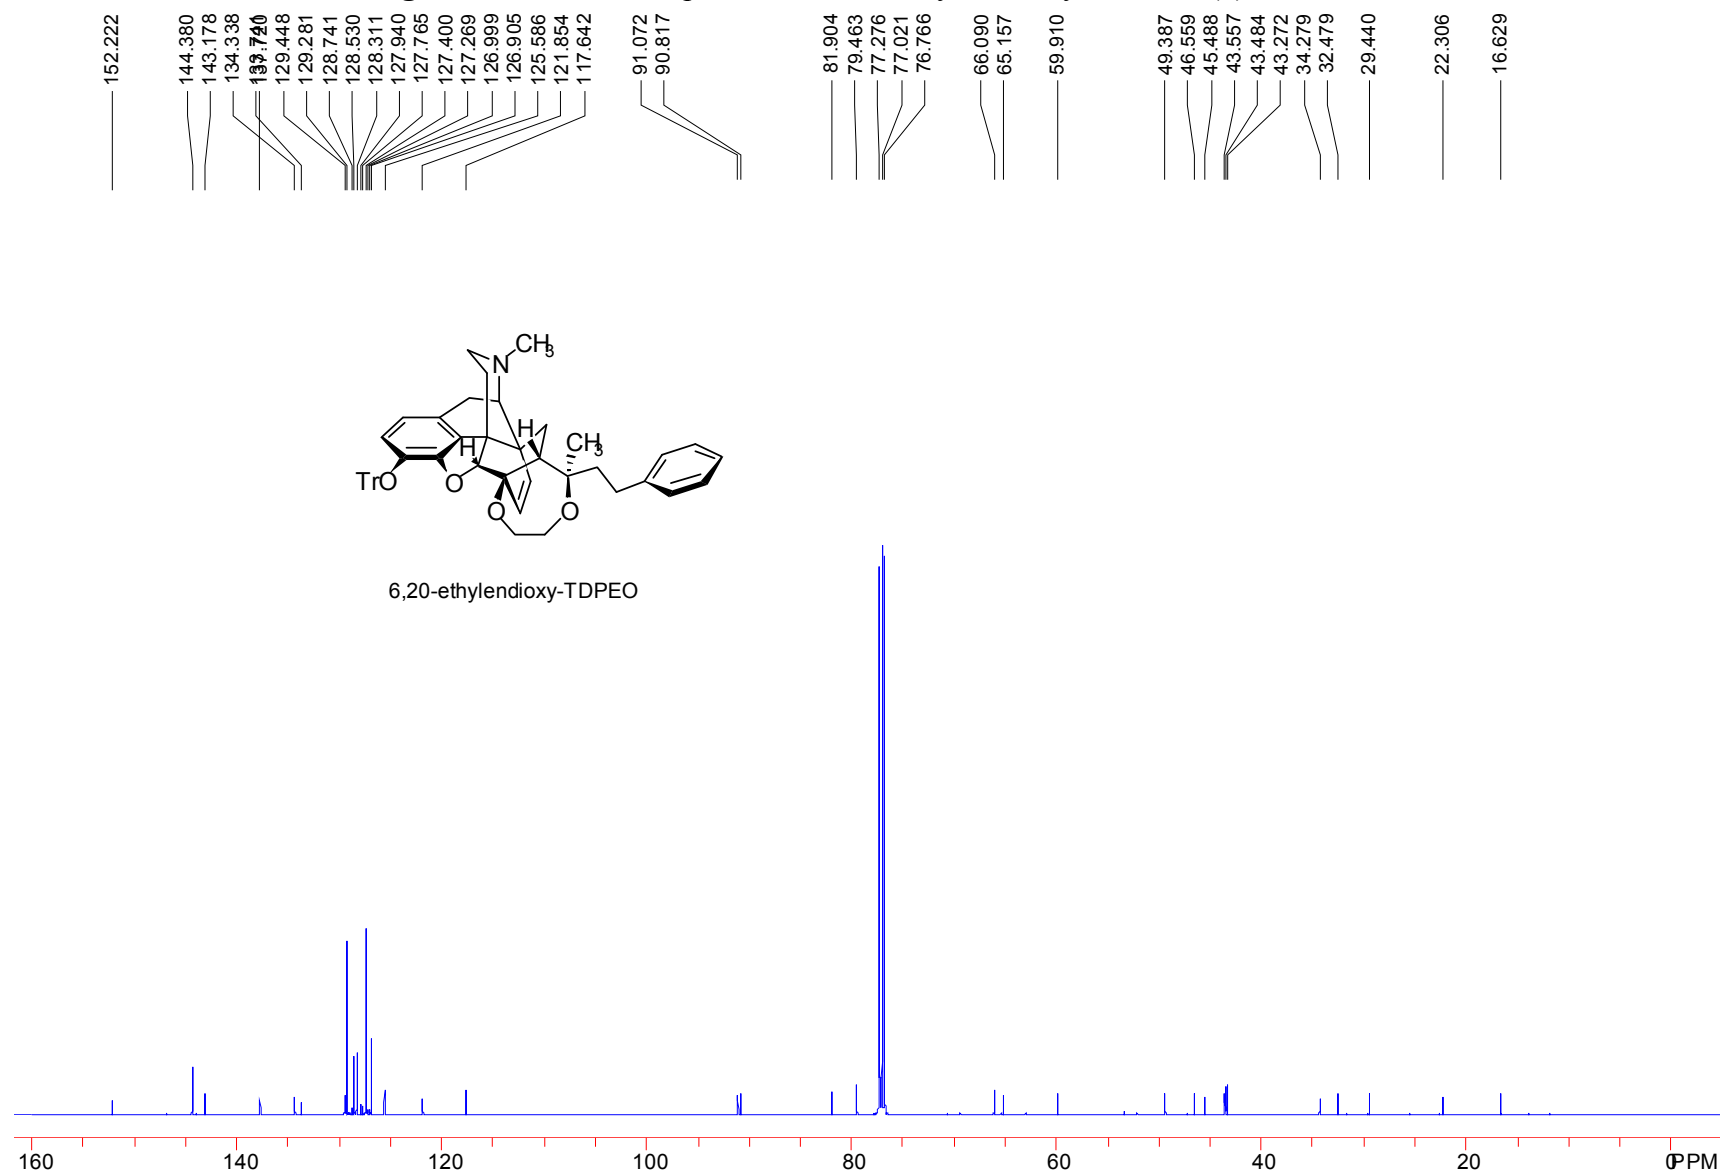

**Figure S20.** ESI-MS of 6,20-ethylenedioxy -TDPEO (7).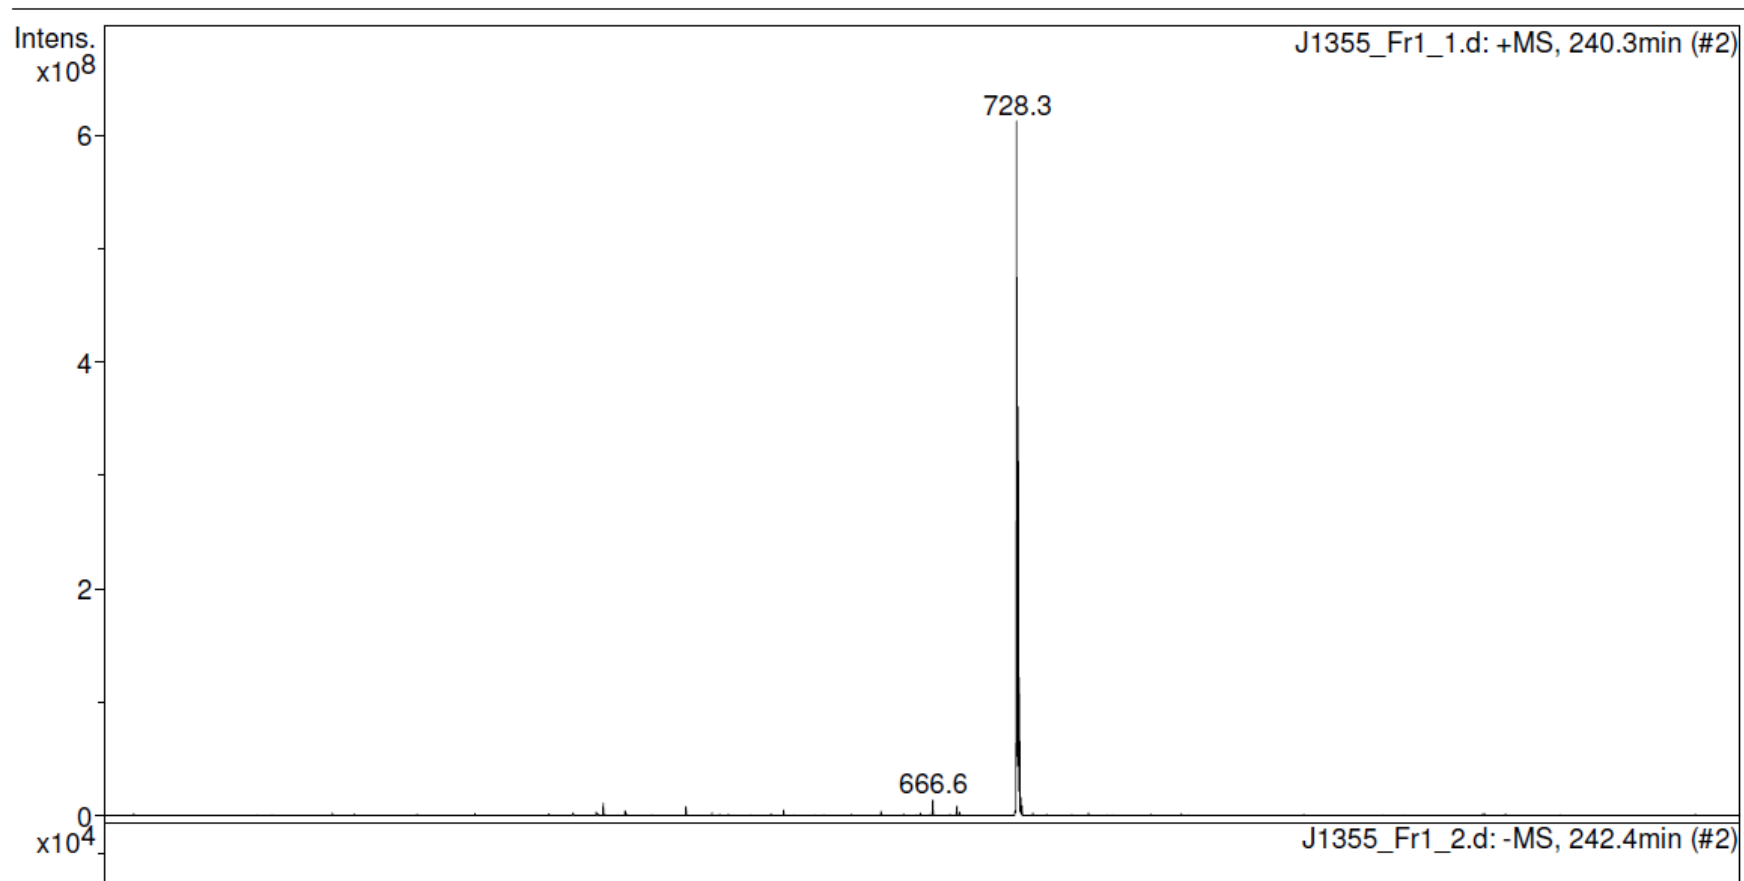

**Figure S21.**  $^1\text{H}$ -NMR spectrum of DPET (**9**) in  $\text{CDCl}_3$ .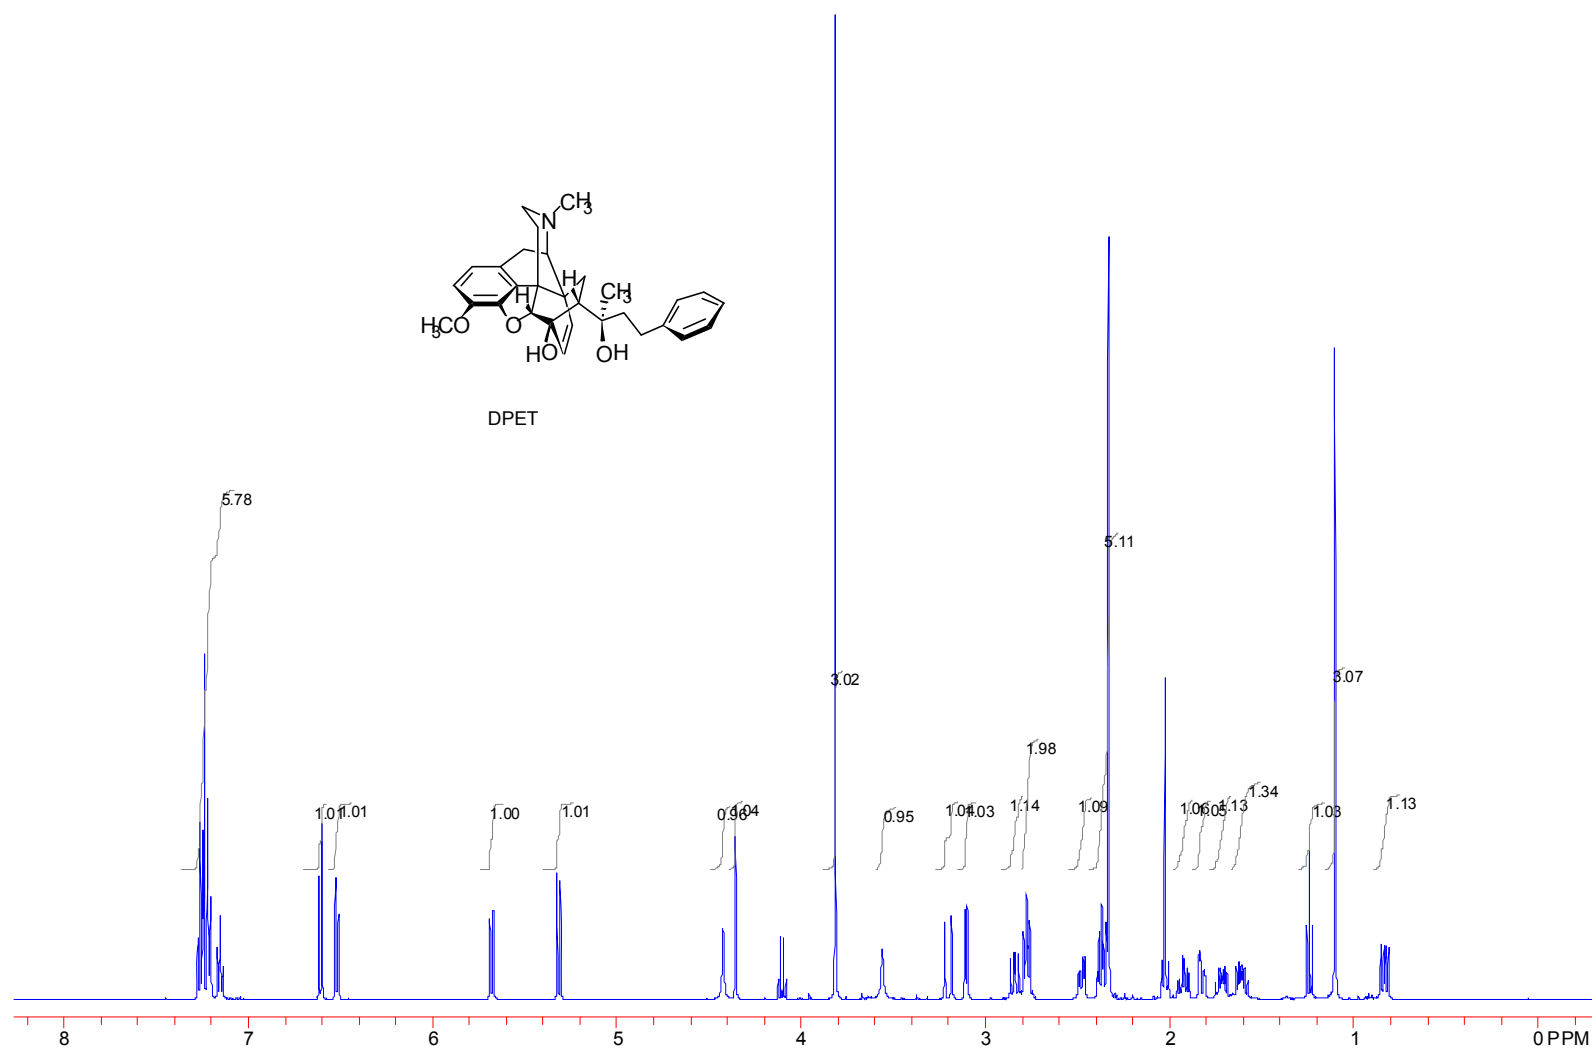

**Figure S22.**  $^{13}\text{C}$ -NMR spectrum of DPET (9) in  $\text{CDCl}_3$ .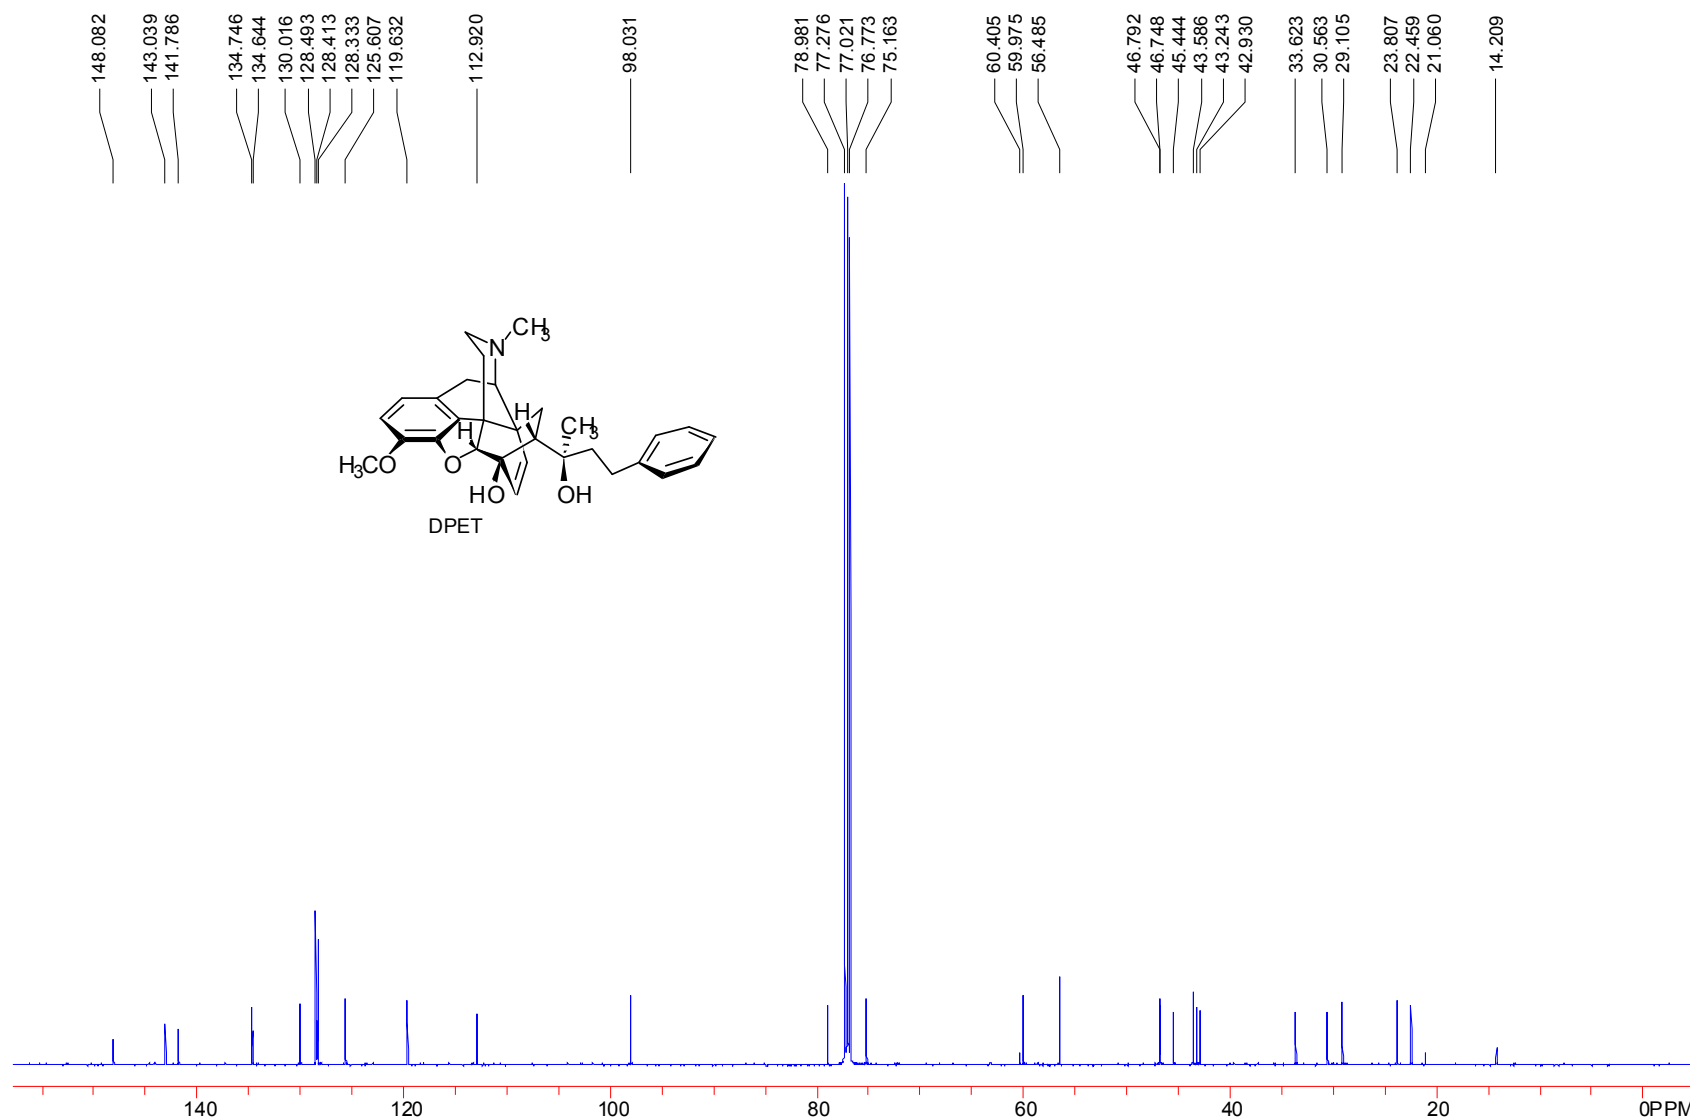

Figure S23. ESI-MS of DPET (9).

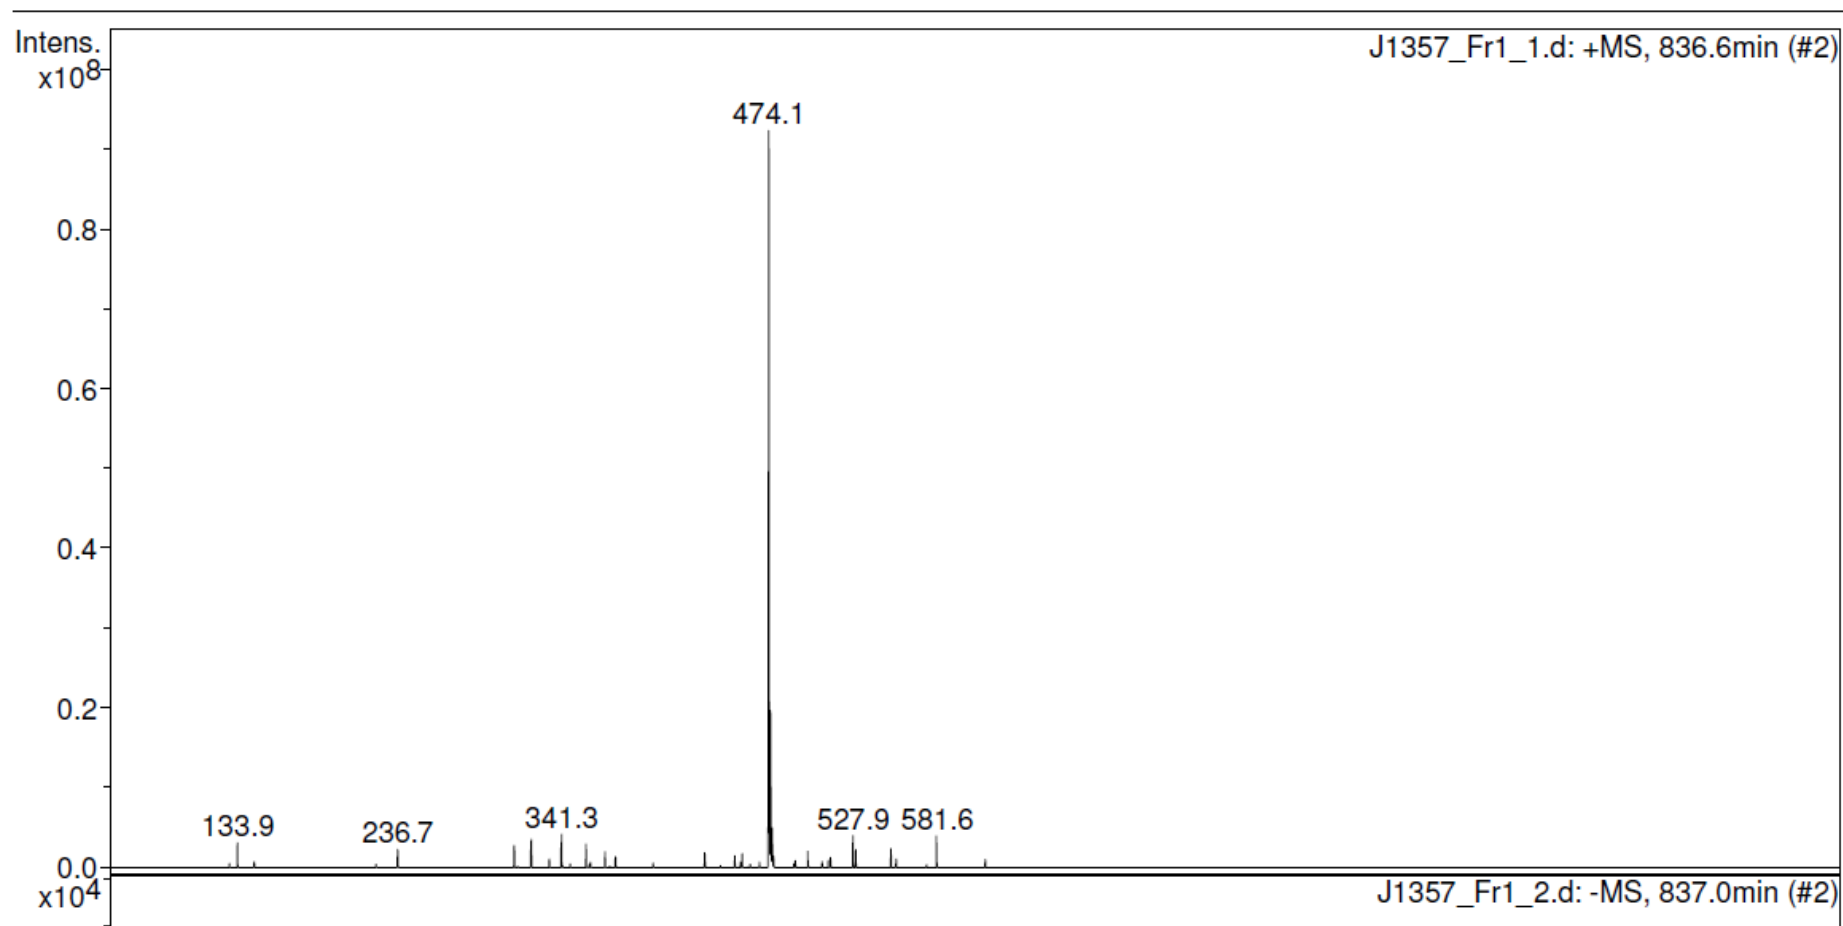

**Figure S24.**  $^1\text{H}$ -NMR spectrum of FE-DPET (10) in  $\text{CDCl}_3$ .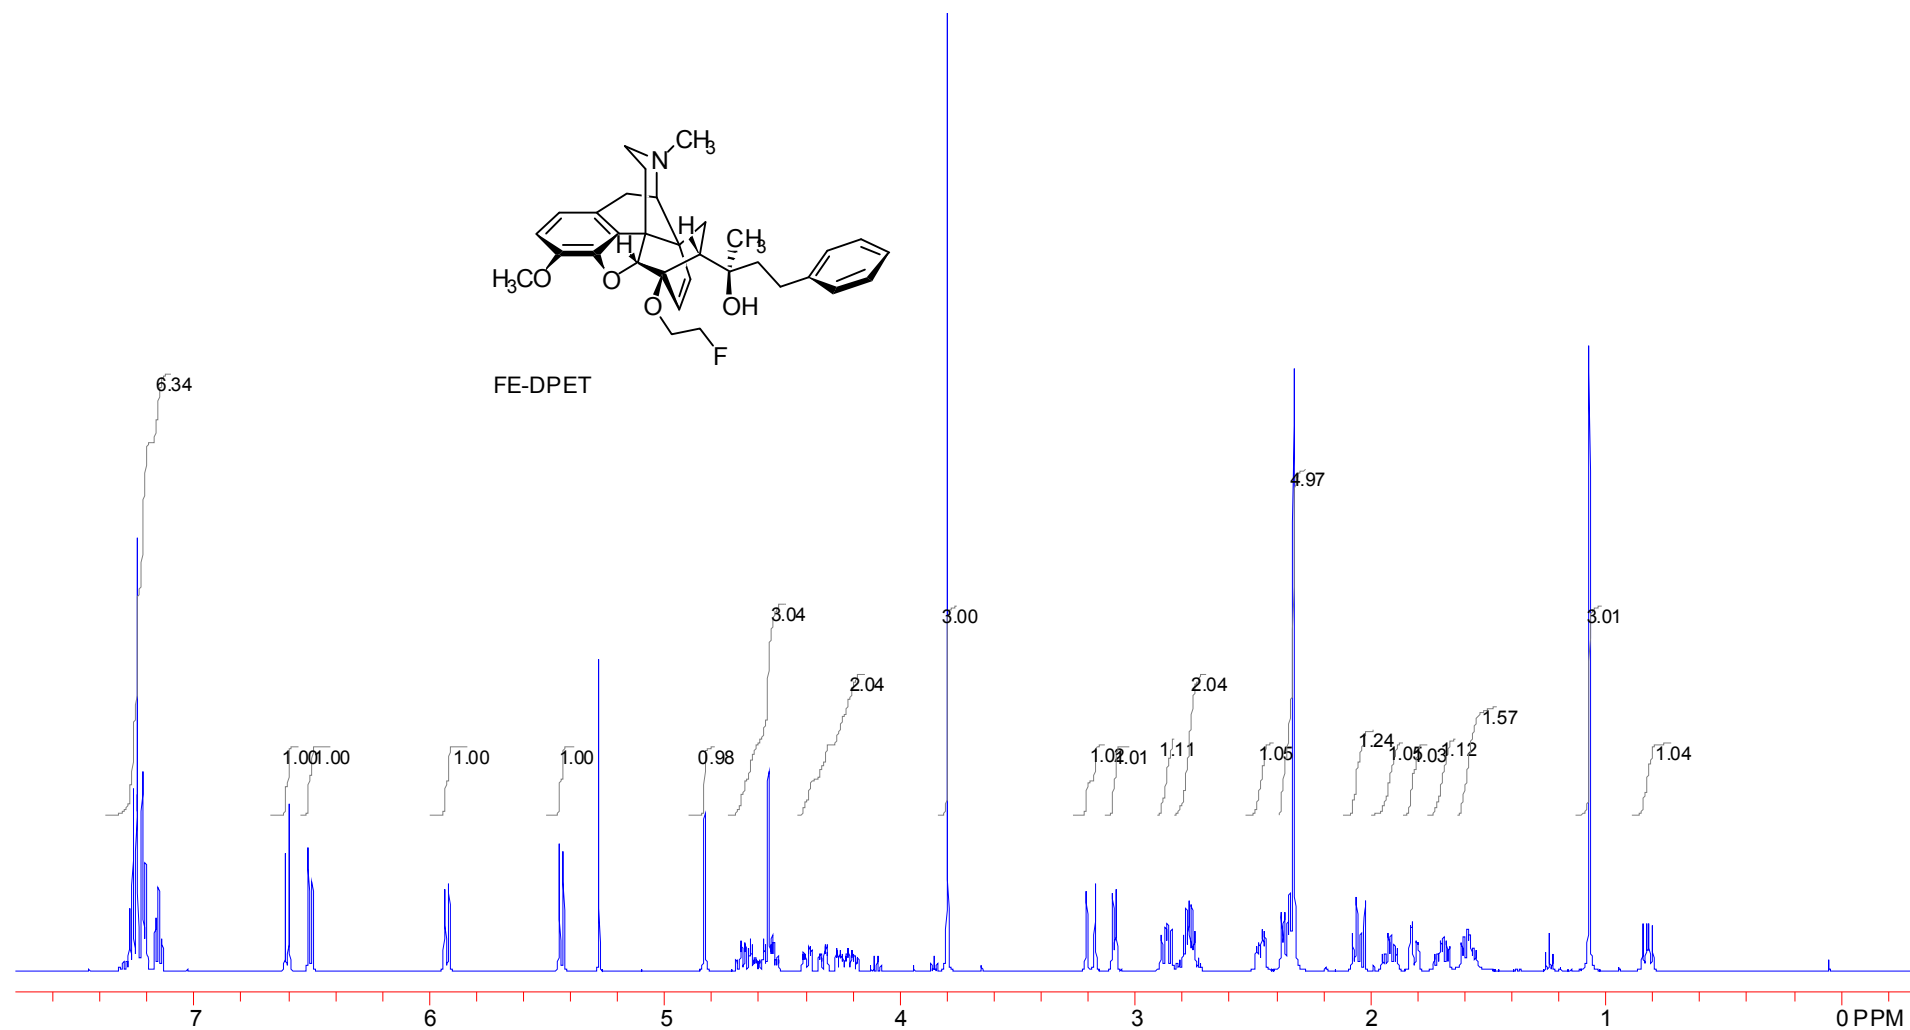

**Figure S25.**  $^{13}\text{C}$ -NMR spectrum of FE-DPET (**10**) in  $\text{CDCl}_3$ .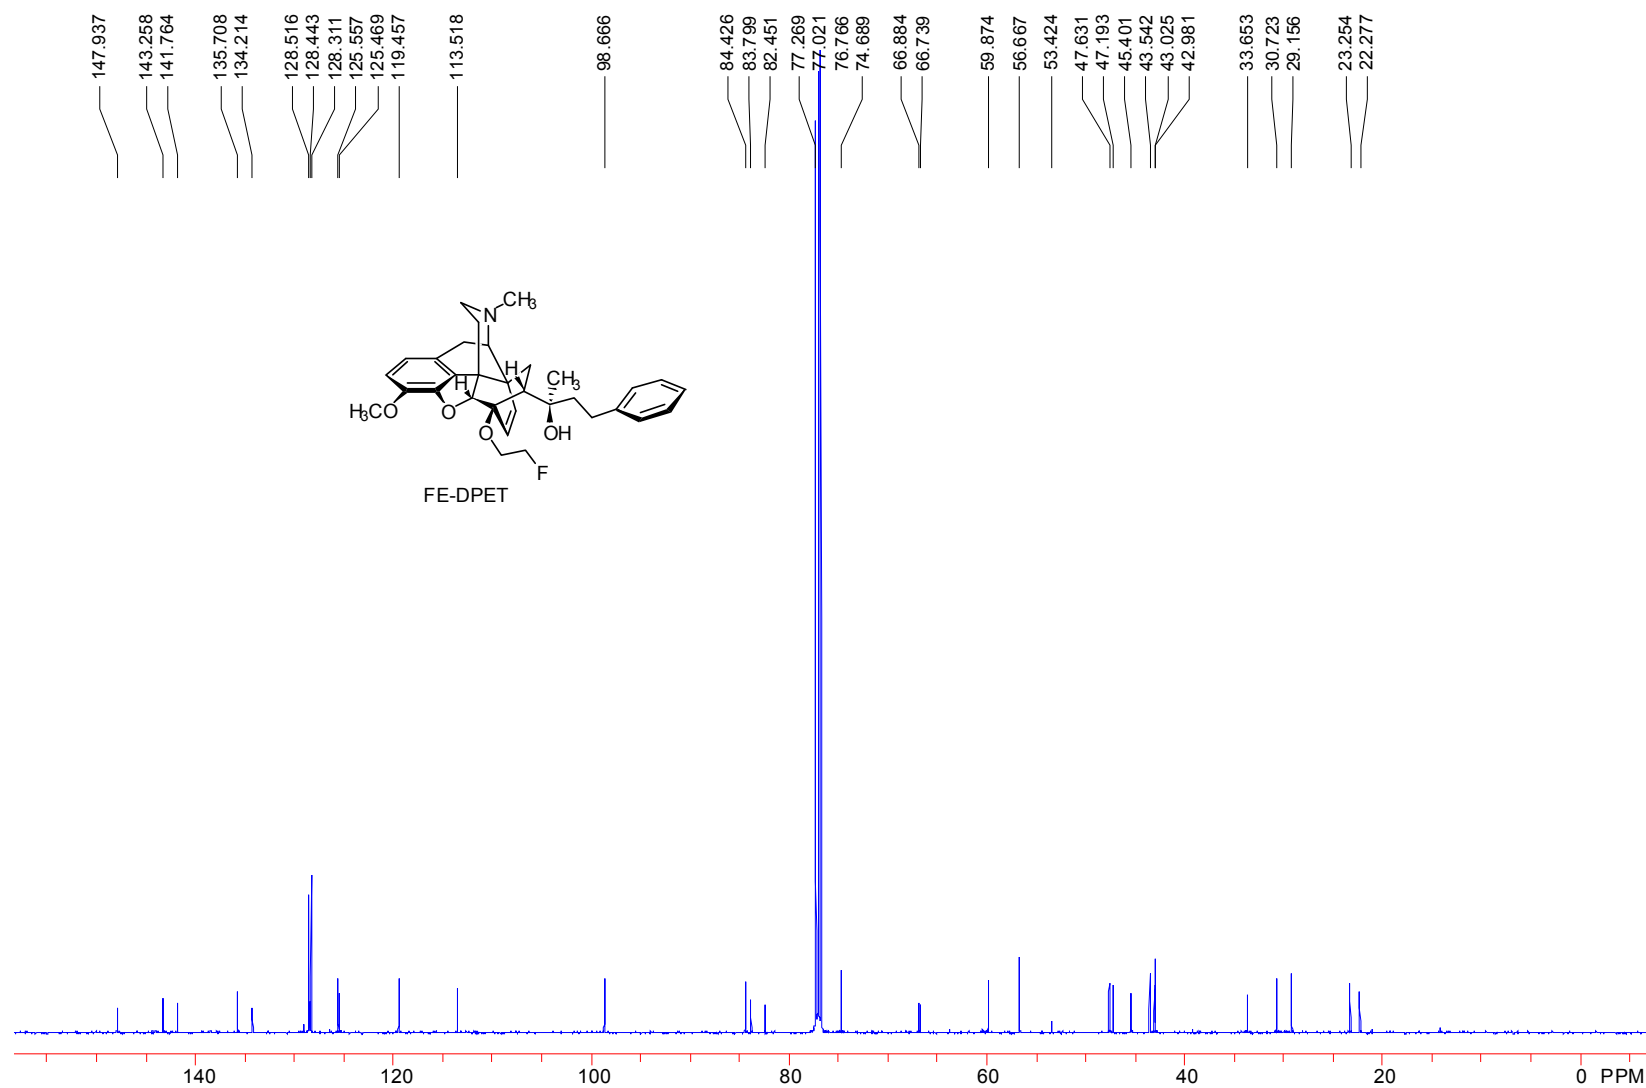

**Figure S26.**  $^{19}\text{F}$ -NMR spectrum of FE-DPET (10) in  $\text{CDCl}_3$ .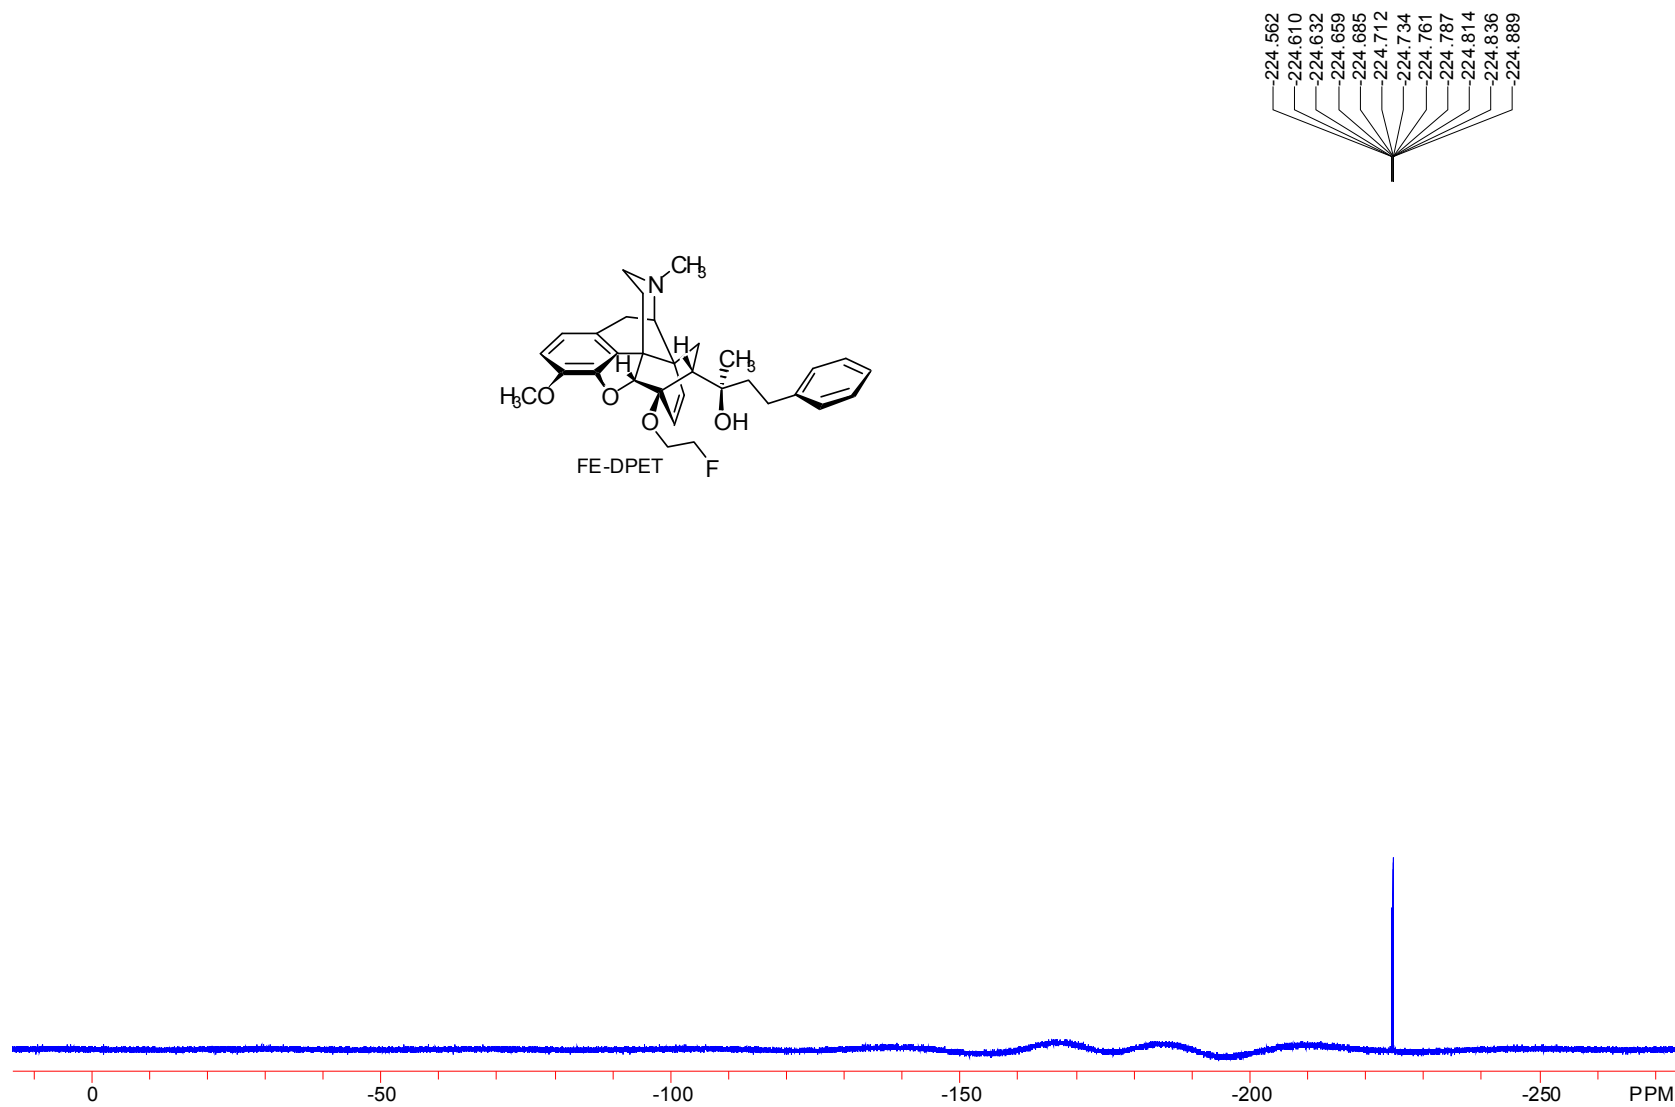

Figure S27. ESI-MS of FE-DPET (10).

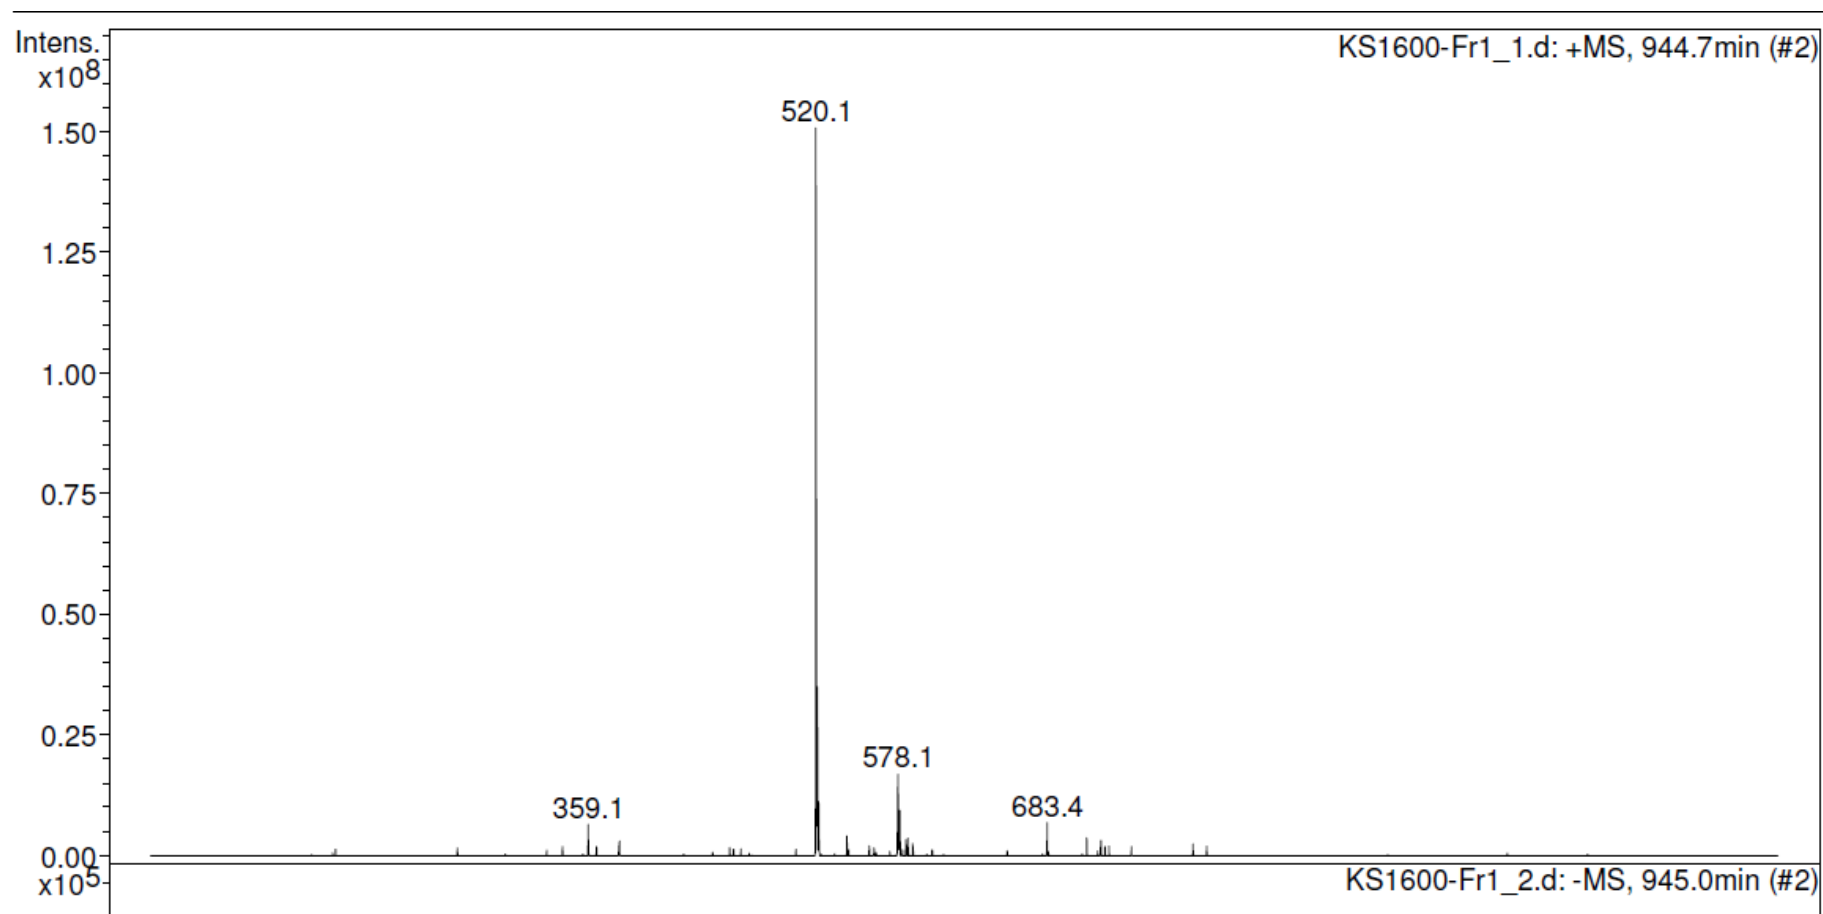

**Figure S28.**  $^1\text{H}$ -NMR spectrum of E-DPET (11) in  $\text{CDCl}_3$ .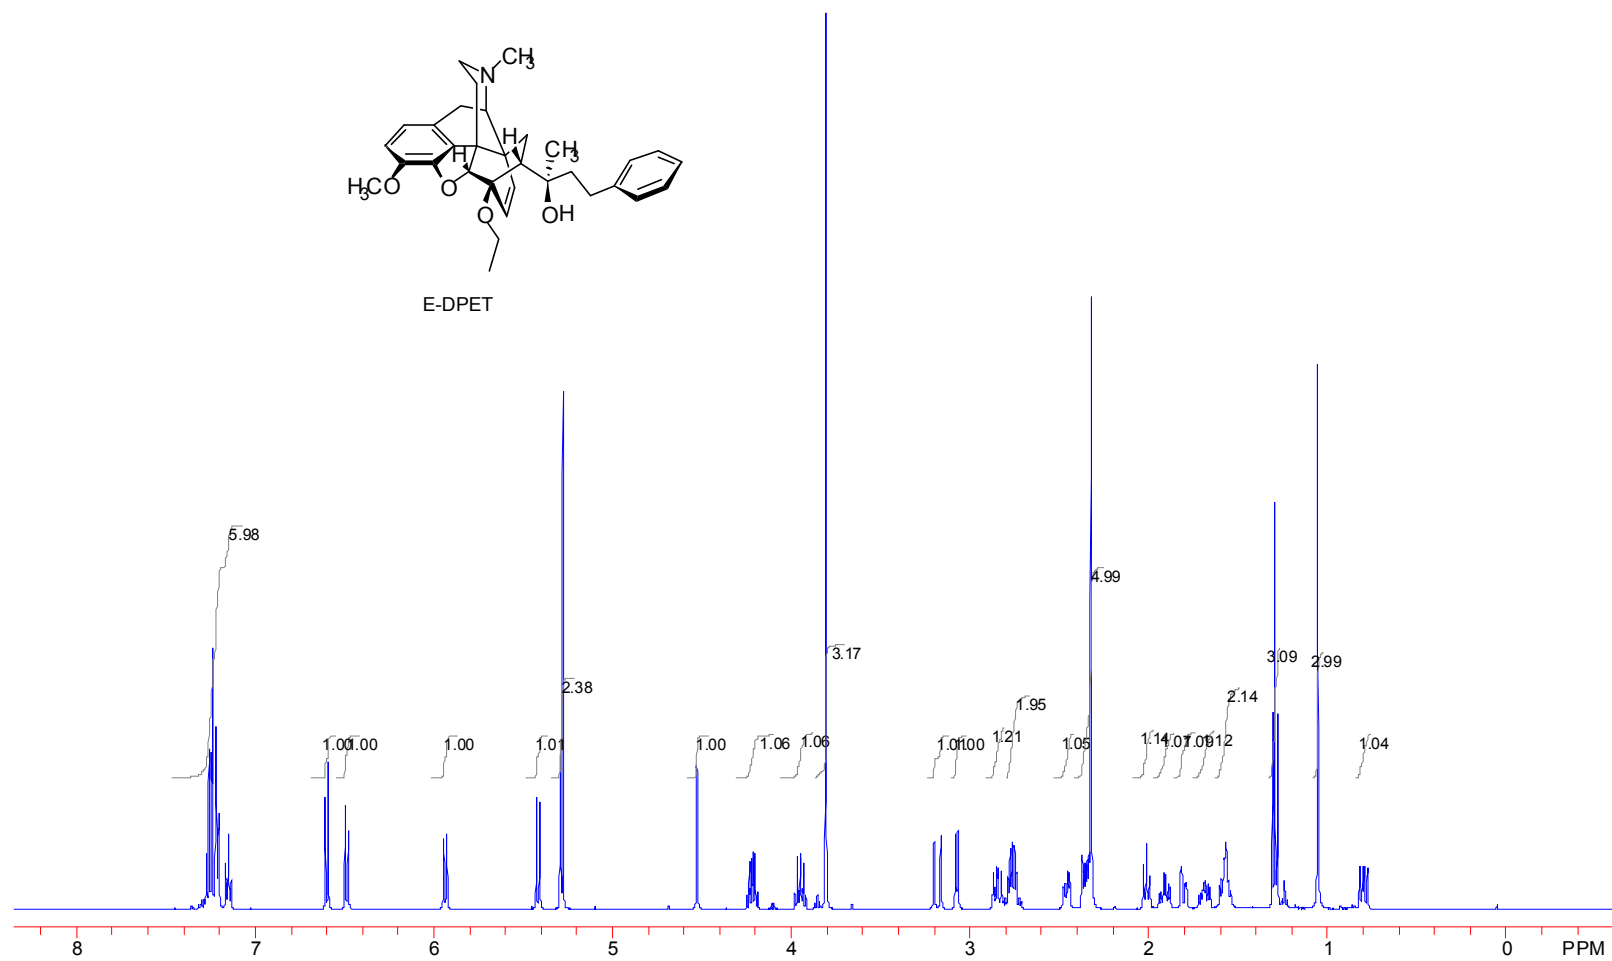

**Figure S29.**  $^{13}\text{C}$ -NMR spectrum of E-DPET (11) in  $\text{CDCl}_3$ .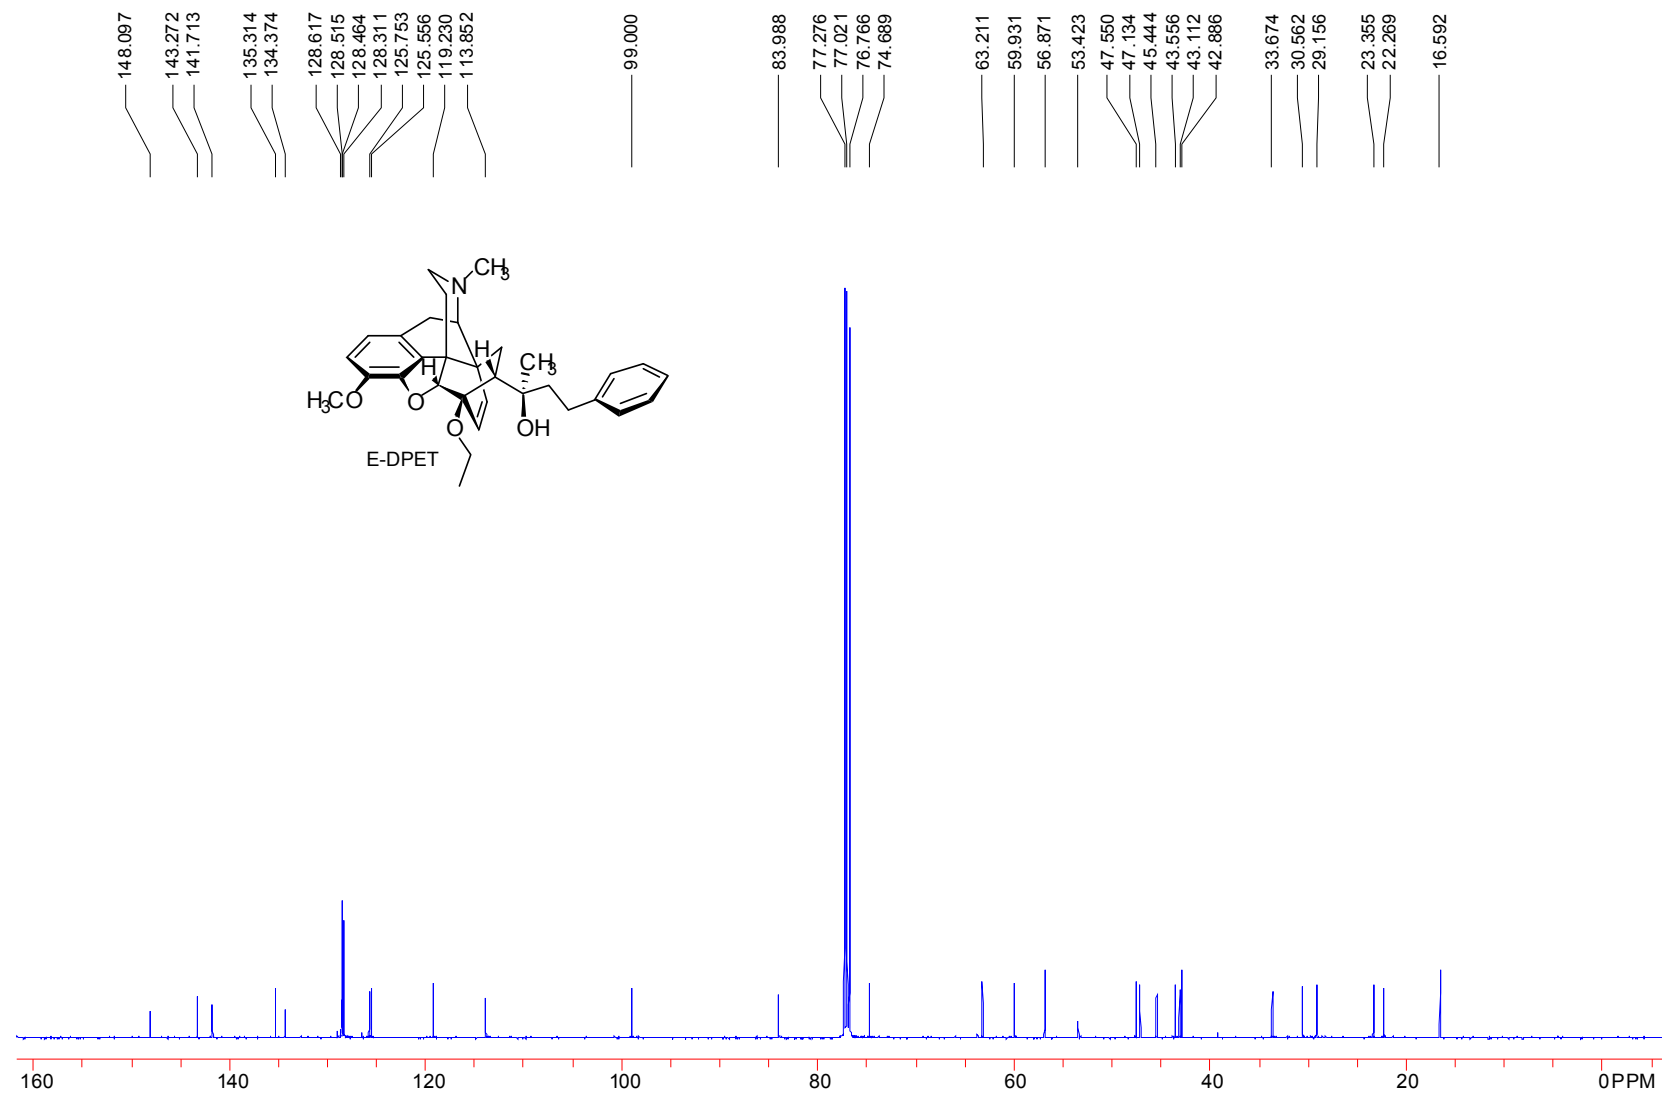

**Figure S30.** ESI-MS of E-DPET (11).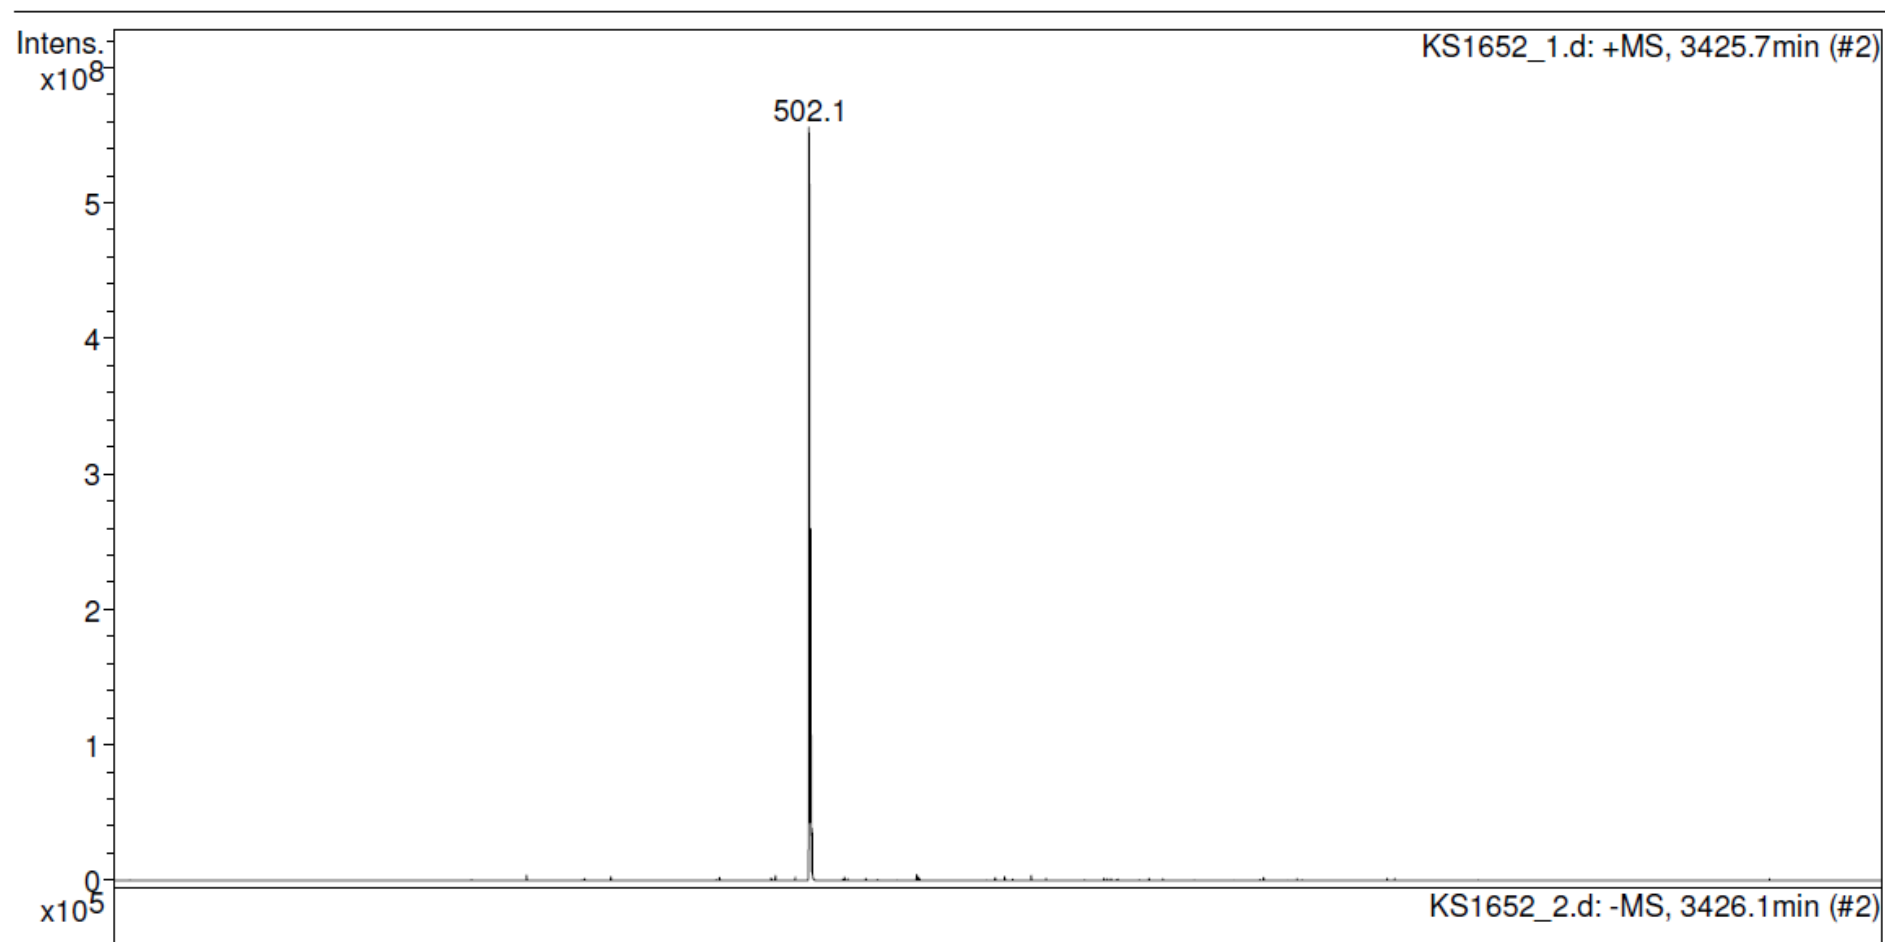

**Figure S31.**  $^1\text{H}$ -NMR spectrum of (2-Brom-ethoxy)-*tert*-butyl-diphenyl-silan (**15a**).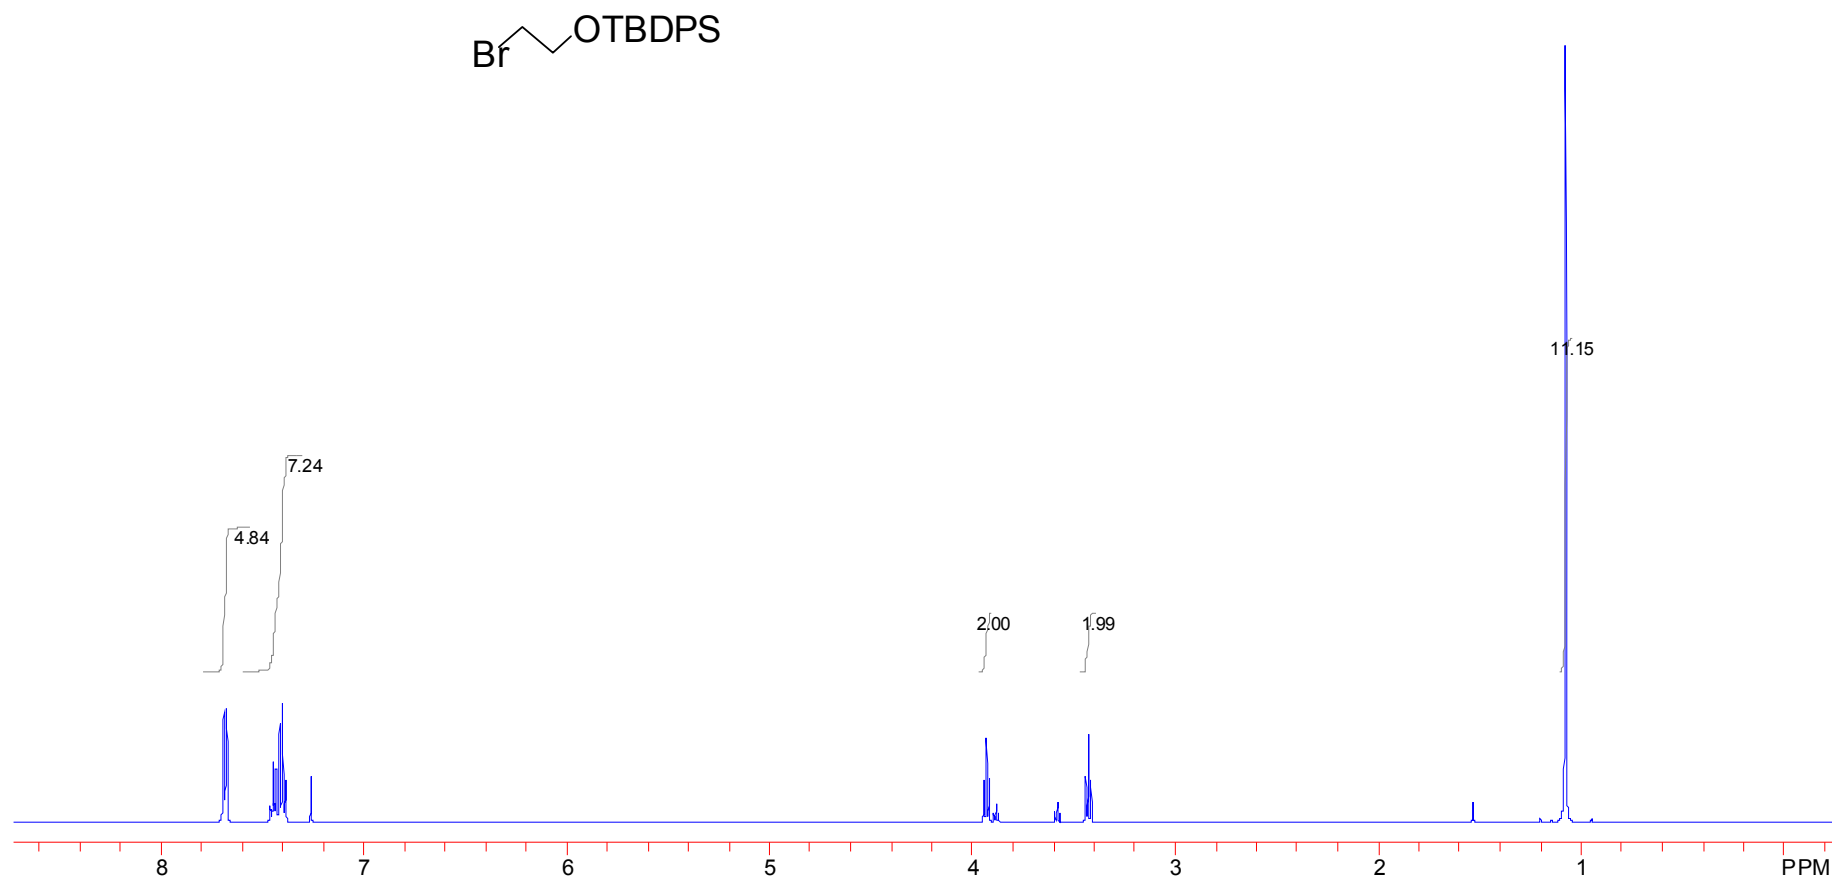

**Figure S32.**  $^{13}\text{C}$ -NMR spectrum of (2-Brom-ethoxy)-*tert*-butyl-diphenyl-silan (**15a**).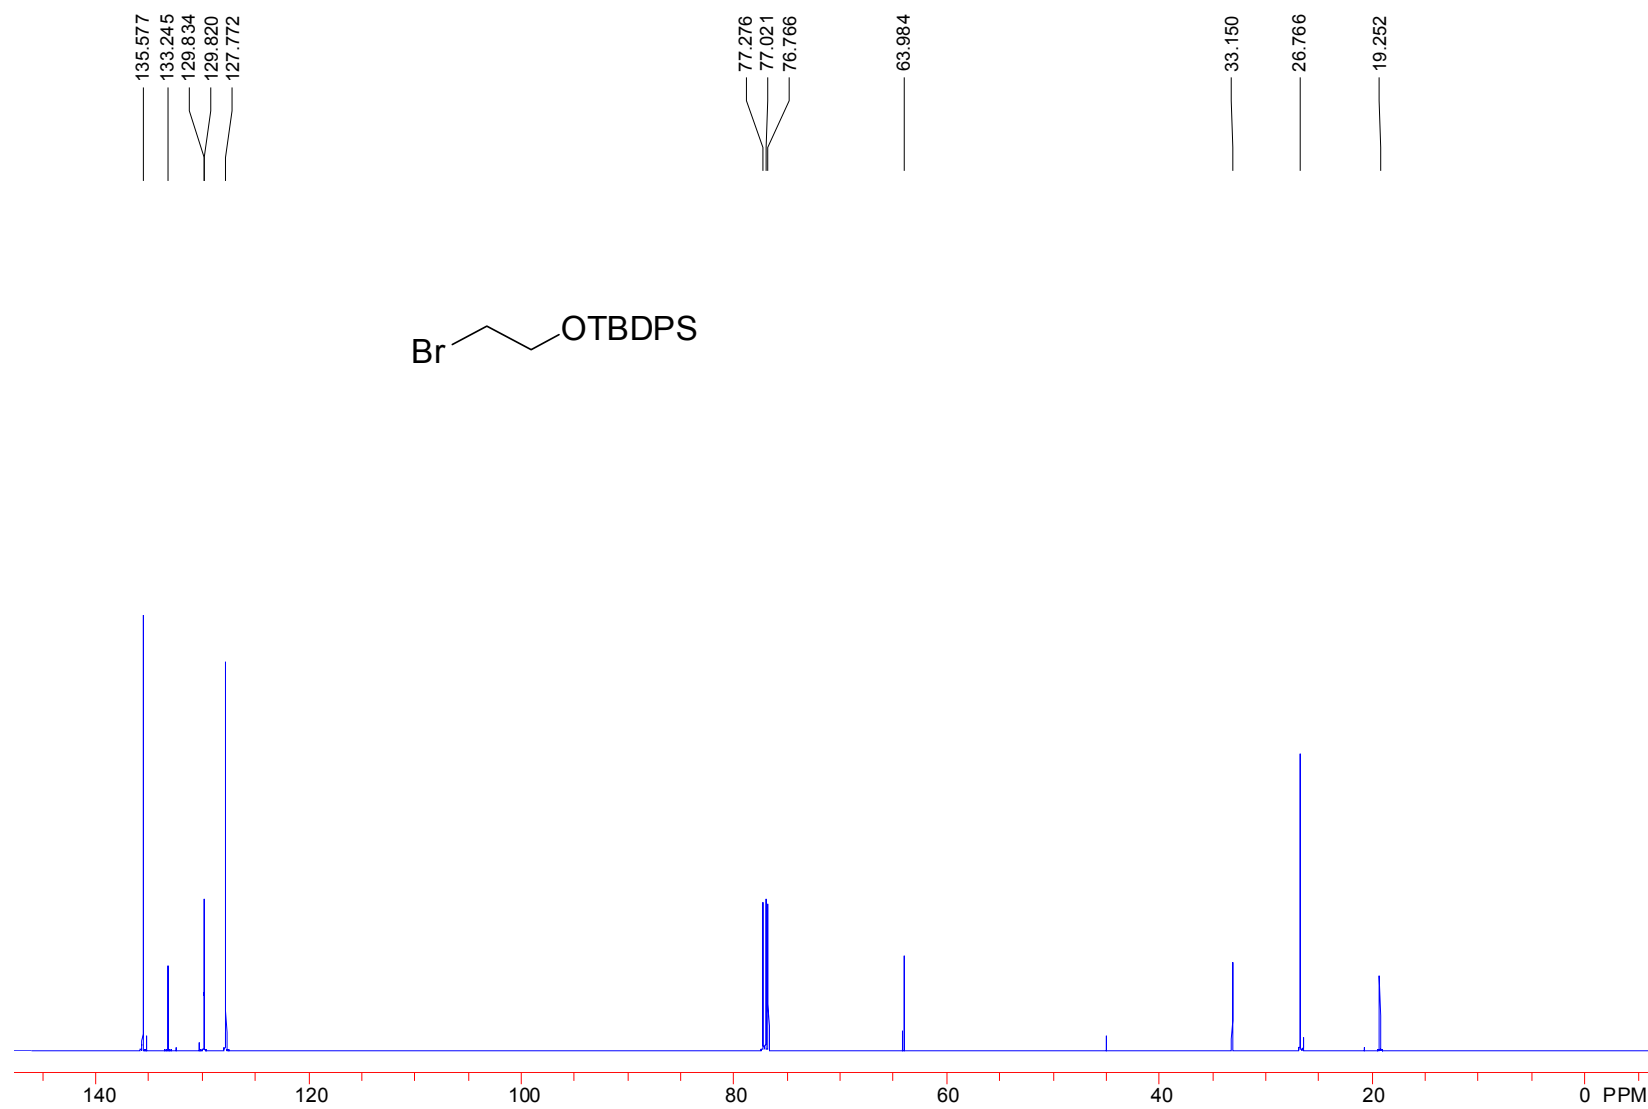

**Figure S33.**  $^1\text{H}$ -NMR spectrum of (2-Brom-ethoxy)-*tert*-butyl-dimethyl-silan (**15b**).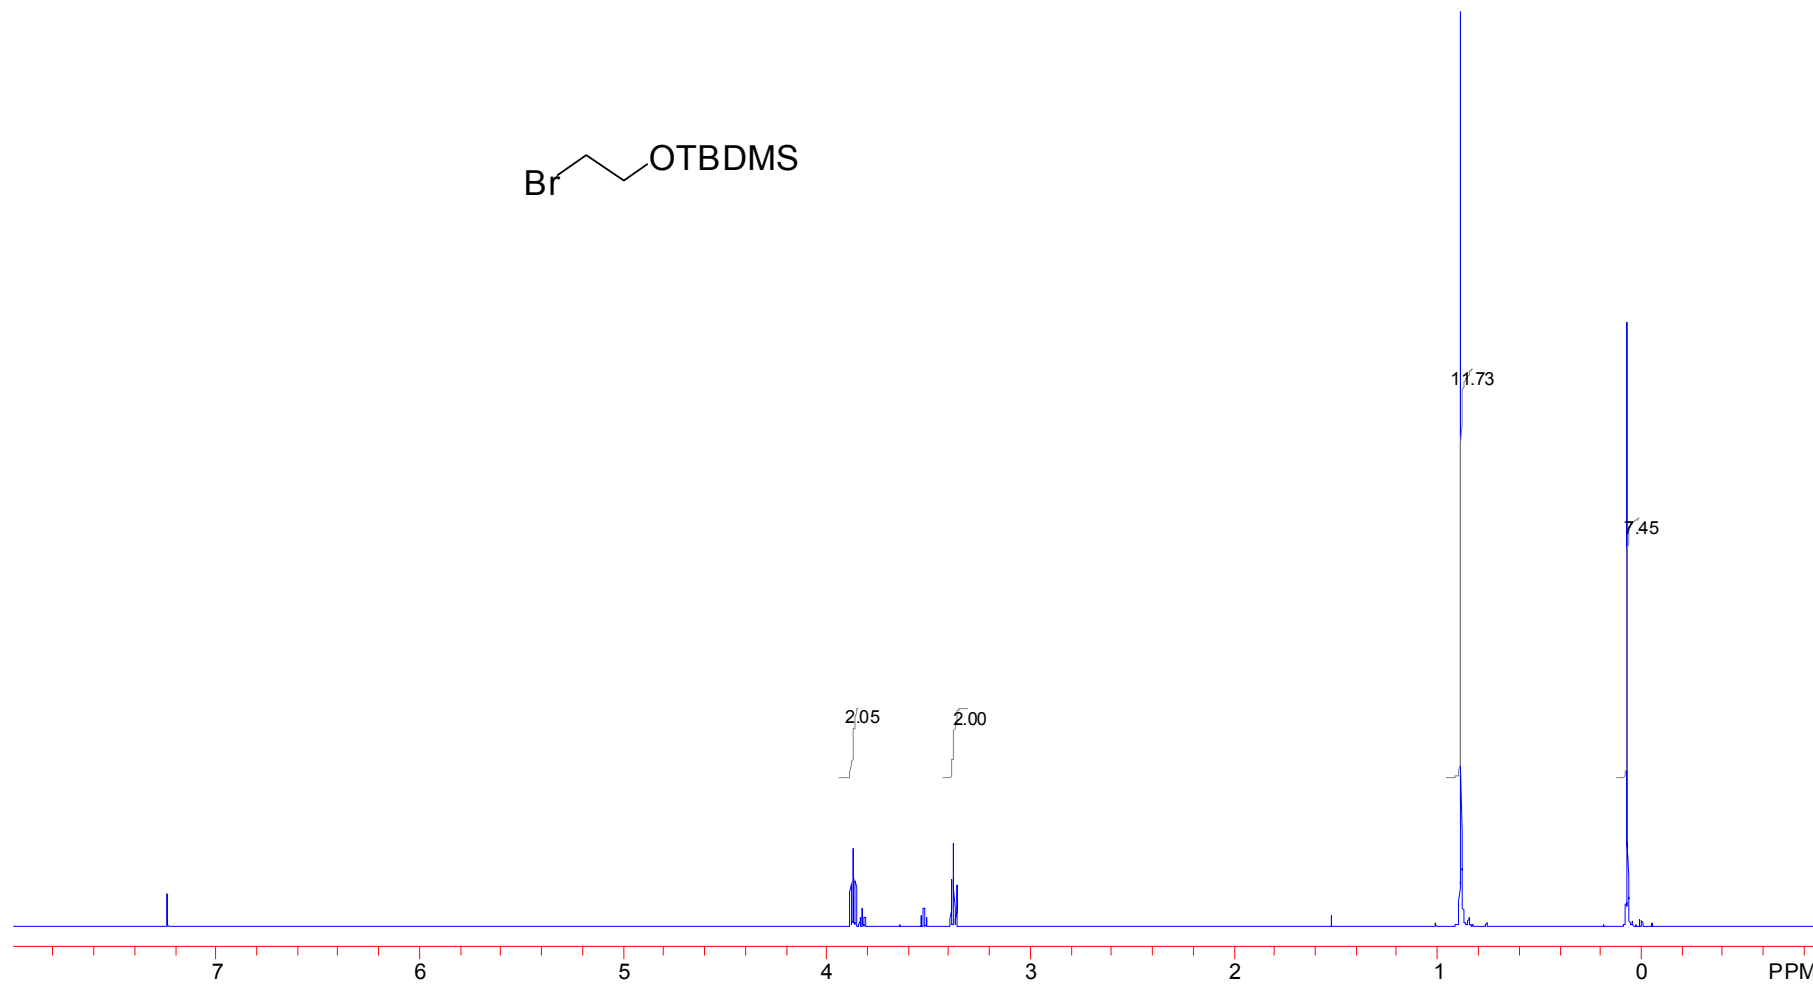

**Figure S34.**  $^{13}\text{C}$ -NMR spectrum of (2-Brom-ethoxy)-*tert*-butyl-dimethyl-silan (**15b**).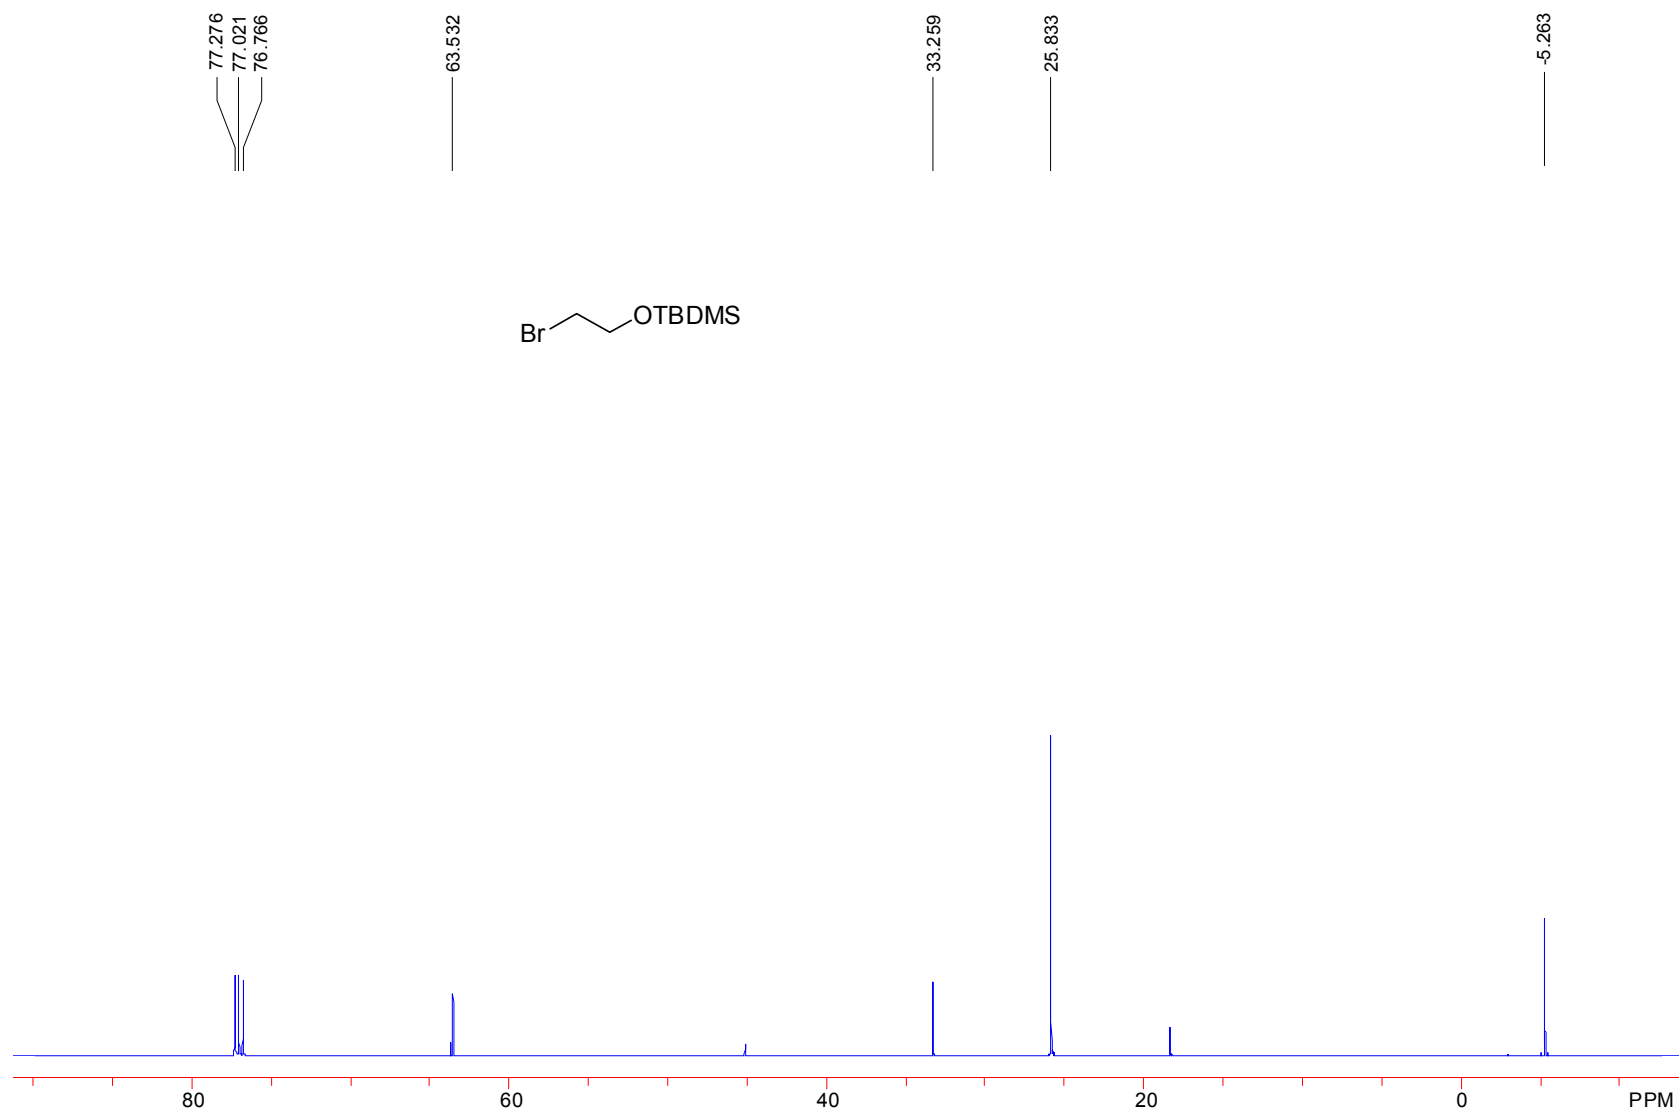

Supplement: Supplementary file 1 [file molecules-17-11554-s001.pdf]
